# Supplementary material for: M6A-mediated-upregulation of lncRNA BLACAT3 promotes bladder cancer angiogenesis and hematogenous metastasis through YBX3 nuclear shuttling and enhancing NCF2 transcription
Source: PubMed Central journal article supplement (PMC10541332; doi:10.1038/s41388-023-02814-3), 2023-08-23
Supplement: 41388_2023_2814_MOESM1_ESM.pdf [file 41388_2023_2814_MOESM1_ESM.pdf]

## Supplementary Information

### This PDF file includes:

Supplementary Materials and Methods

Supplementary Tables 1-11

Supplementary Figure Legends 1-15

Supplementary Figures 1-15

**M6A-mediated-upregulation of lncRNA BLACAT3 promotes bladder cancer angiogenesis and hematogenous metastasis through YBX3 nuclear shuttling and enhancing NCF2 transcription**

Jinbo Xie<sup>1, 2, 3, 4, 8</sup>, Hui Zhang<sup>5, 8</sup>, Keyi Wang<sup>1, 8</sup>, Jinliang Ni<sup>1, 8</sup>, Xiaoying Ma<sup>3, 4</sup>, Christopher J. Khoury<sup>3, 4</sup>, Viktor Prifti<sup>3, 4</sup>, Brock Hoard<sup>3, 4</sup>, Eric G. Cerenzia<sup>3, 4</sup>, Lei Yin<sup>6</sup>, Houliang Zhang<sup>1, 7</sup>, Ruiliang Wang<sup>1</sup>, Dong Zhuo<sup>2✉</sup>, Weipu Mao<sup>7✉</sup>, Bo Peng<sup>1✉</sup>

## **SUPPLEMENTARY MATERIALS AND METHODS**

### **Bioinformatics**

Bioinformatics analysis were carried out in the R version 4.0.2 environment. In the visualization process, the dplyr package was used for data arrangement and conversion, the RColorBrewer package was used for color setting, scatter plots were drawn by R basic drawing function, volcano maps were drawn by ggplot2 package, Venn diagrams were produced by VennDiagram package, heat maps were drawn by OmicCircos package, bubble charts and bar charts were drawn by ggplot2 package, pie chart was drawn by viridis package, GSEA analysis was carried out by clusterProfiler and enrichplot packages. Adobe Illustrator 2020 was used for post-processing.

### **Mouse models**

A total of 24 male NOD-Prkdcscid Il2rgem1/Smoc mice (1) (Cat. NO.: NM-NSG-001) aged 4 weeks were commercially supplied by Shanghai Model Organisms, Inc (Shanghai, China), and the animal quality identification of SPFcondition was conducted by VRL Laboratories (Suzhou, China) (Certificate NO.: 20170010015248). To ensure statistical significance, the number of mice in each group was set at 3, and 24 mice were randomly assigned to each group. T24 and 5637 cells stably transfected with lentiviruses containing different plasmids were utilized to establish two different mouse models. In subcutaneous xenograft models,  $1 \times 10^6$  cancer cells suspended in 100 mL of PBS buffer were subcutaneously injected into each mouse. The length and width of the subcutaneous tumor was measured every 7 days, and the tumor volume was calculated by the formula: Volume ( $\text{mm}^3$ ) =  $0.5 \times L$  (length)  $\times W^2$  (width). On the 28th day after

subcutaneous injection of cells, in vivo imaging of the mice was performed, and the mice were sacrificed on the 35th day. Meantime the subcutaneous tumor tissues were harvested and weighed. The pathology assays were then carried out. In hematogenous metastatic models, each mouse was injected with  $3 \times 10^5$  cancer cells in 100  $\mu$ L of PBS buffer. Live imaging was performed on the 28th day after tail vein injections, and the mice were then sacrificed on the 35th day. The lungs and other organs with suspected metastases were resected, and tissue sections were prepared for H&E, IHC or IF staining. All the animal experiments were approved by Tongji University Laboratory Animal Welfare Ethics Review Working Group Committee (Approval NO.: TJBA01920101).

#### **Cell lines and culture conditions**

T24 (RRID: CVCL\_0554), 5637 (RRID: CVCL\_0126) and UM-UC-3 (RRID: CVCL\_1783) cells were cultured in RPMI 1640 medium. J82 (RRID: CVCL\_0359) cells were cultured in Minimum Essential Medium (MEM). SV-HUC-1 (RRID: CVCL\_3798) cells were cultured in Ham's F-12K medium. RT4 (RRID: CVCL\_0036) cells were cultured in McCoy's 5a medium. SW780 (RRID: CVCL\_1728) and HEK 293T (RRID: CVCL\_0063) cells were cultured in Dulbecco's Modified Eagle's Medium (DMEM). Human umbilical vein endothelial cells (HUVECs) (RRID: CVCL\_2959) were cultured in Endothelial Cell Medium (ECM). The media was pre-treated with 10% fetal bovine serum (FBS; Gibco) and 1% penicillin/streptomycin prior to usage. All the cell lines were purchased from iCell Bioscience Inc. (Shanghai, China) except for SW780, which was purchased from WHELAB (Shanghai, China). Cell line STR authentication and microbial detection was performed by Shanghai Biowing Applied Biotechnology Co. LTD (Shanghai,

China).

### **Cell transfection**

The small interference RNA (siMETTL3, siMETTL14, siWTAP, siFTO, siALKBH5, siYBX3 and siNCF2) oligos were designed and synthesized by IBSBIO (Shanghai, China), and the oligo sequences were listed in Supplementary Table 6. The full-length cDNAs of human ALKBH5 and YBX3 were synthesized and cloned into the pcDNA3.1(+)-3xflag vector. The plasmids which mediated ALKBH5 or YBX3 overexpression were commercially supplied by IBSBIO (Shanghai, China). Transient transfection was performed using Lipofectamine™ 3000 Transfection Reagent (Catalog # L3000001, Invitrogen, U.S.) in accordance with the manufacturer's protocol.

### **Lentivirus transduction and screening of stable strains**

Lentivirus transduction was performed to establish stable knockdown and overexpression of BLACAT3 BLCa cell strains. Briefly, there were three steps as follows: For lentiviral vector construction, the shRNA sequences that specially target BLACAT3 or the full length of BLACAT3 were cloned into vectors of Plko.1-puro-GFP or CMV-MCS-EF1 $\alpha$ -copGFP-T2A-puro (with or without luciferase). The shRNA sequences were listed in Supplementary Table 6. For lentiviral vector package and purification, lentivirus packaging plasmids and vectors of BLACAT3 knockdown or overexpression were con-transfected into the packaging cells (HEK-293T) and incubated for 48 hours, then the supernatants containing virus particles were collected and purified. These two steps were performed by assistant of Zorinbio Technology Co., Ltd (Shanghai, China). For Lentivirus transduction, T24 and 5637 cells were infected by

lentivirus with the presence of polybrene (Catalog # 32160801, Sigma-Aldrich, U.S.), and the stable cell strains were selected by 5 µg/mL of puromycin (Catalog # A1113802, Thermo Fisher Scientific, U.S.) within two weeks.

#### **Cell Counting Kit-8 (CCK-8) assay**

CCK-8 reagent was commercially supplied by YEASEN (Catalog#40203ES60, China). T24 or 5637 cells growing in the logarithmic phase were digested to prepare the cell suspension.  $2 \times 10^3/100$  µL cells per well were added into a 96-well culture plate, then incubated at 37°C. At different time points including 24, 48, 72 and 96 hours, the medium was refreshed, then 10 µL of the CCK-8 solution was added into each well. After incubating for 2 hours at 37°C, the absorbance was detected using microplate reader at wavelength of 450 nm.

#### **5-Ethynyl-2'-deoxyuridine (EdU) assay**

Cell-Light™ EdU Apollo567 in vitro Kit was purchased from RiboBio (Catalog # C00054, China). The experiment was performed in accordance with the manufacturer's protocol. Cell nuclei were stained using Hoechst reagent. Pictures were captured by the fluorescent inverted microscope.

#### **Wound-healing assay**

BLCa cells were resuspended and cultured in a six-well plate, which should just be confluent overnight. The next day, scratches were made using tips, then cells were washed for 3 times, and refreshed with serum-free medium. Cells were incubated at 37°C. Pictures were captured

by the fluorescent inverted microscope at 0 and 24 hours. Image J software was utilized to measure the percent of wound healed.

### **Plate Cloning assay**

Cells in the logarithmic growth phase were digested and resuspended, then they were seeded in a 6-well plate at a density of 500 cells per well. The cells were cultured at 37°C, and generally the medium was replaced every three days. 14 days later, the culture medium in the six-well plate was removed, and after washing for three times, cells were fixed with formaldehyde solution and stained with 0.1% crystal violet solution. Finally, the colonies were counted and photographed.

### **HUVEC tube formation assay**

200µL Matrigel basement membrane matrix (Catalog # 356234, BD Biosciences, U.S.) was added into each well of the 24-well plate and placed in a 37°C incubator for 1h. Next, HUVECs were resuspended in media containing the supernatant from BLCa cells, then 5000 cells per well were seeded in 24-well plates, and cultured at 37 °C for 4 h. Tube formation was photographed under a microscope and counted by Image J software.

### **Transwell migration assay**

Different groups of BLCa cells were pre-suspended in serum-free medium. Each upper chamber was added into  $8 \times 10^4$  cells, and the lower chamber was added into complete medium containing 10% FBS. After being incubated at 37°C for 12-24 hours, the remaining cells in the

upper chamber were wiped away. Cells penetrating to the outside surface of membrane were fixed with 4% formaldehyde solution, stained with 0.1% crystal violet solution, then photographed under a microscope. Image J software was utilized to count the migrative cells.

### **RNA stability assays**

Actinomycin D (Catalog # A9495, Sigma-Aldrich, U.S.) was used to block the transcription process in the RNA stability assay, with the working concentration 2 µg/mL. After actinomycin D treatment, cell samples were collected at 3 h and 6 h, then RNA was extracted for qRT-PCR analysis.

### **Subcellular fractionation**

RNA and protein subcellular fractionation of BLCa cells were performed using nuclear and cytoplasmic extraction PARIS™ Kit (Catalog # 00738305, Invitrogen, U.S.) in accordance with the manufacturer's constructions. The RNA and protein were respectively prepared for qRT-PCR and WB assays.

### **RNA extraction and quantitative real-time polymerase chain reaction (qRT-PCR)**

Total RNA was extracted from tissues or cells using Trizol reagent (Catalog # T9424, Sigma-Aldrich, U.S.). Reverse transcription was performed using RT reagent Kit (Catalog # RR037Q, Takara, Japan). QRT-PCR analysis was performed using TB Green Premix Ex Taq™ II (Catalog # RR820A, Takara, Japan) in accordance with the manufacturer's constructions. Gene expression was calculated using the  $2^{-\Delta\Delta Ct}$  method, with GAPDH or ACTB as the internal

controls. The primer sequences were shown in Supplementary Table 5.

### **Protein preparation and WB assay**

Protein was extracted from tissues or cells using RIPA Lysis Buffer (Catalog # 89900, Thermo Scientific, U.S.). 10% PAGE Gel Fast Preparation Kit was commercially obtained from Epizyme (Catalog # PG112, China) and used to prepare the SDS-PAGE Gels. WB was performed following the previous protocol (2), and the antibodies were listed in Supplementary Table 3.

### **Dot blot assay**

Total RNA was extracted in accordance with the standard procedure. The concentration and OD 260/280 ratio were determined by Nano Drop Spectrophotometer. Total RNA was diluted to 500 ng/ $\mu$ L using DEPC water, and RNA quality was assessed by agarose gel electrophoresis. The RNA was heated to 95°C for 5 min for denaturation of the secondary structure and then immediately cooled on ice for 1 min. 1  $\mu$ L of denatured RNA was pipetted onto a positively charged nylon membrane and was then placed in a UV cross-linker for cross-linking. Unbound RNA was removed by washing with PBST for 10 min, and blocked with 5% skim milk in PBST for 30 min. The m6A primary antibody (1:1000) was incubated at 4°C overnight, after being washed with PBST four times at 5 min per wash. The secondary antibody was incubated for 1 h at room temperature. After being washed for 5 min four 4 times with PBST again, the nylon membrane was exposed using ECL reagent. The nylon membrane was imaged after being stained with methylene blue for 10 min and washed with ddH<sub>2</sub>O for 10 min. The antibody information is listed in Supplementary Table 3.



### **m6A RNA immunoprecipitation (MeRIP)**

The EpiQuik CUT&RUN m6A RNA Enrichment (MeRIP) Kit was purchased from Epigentek (P-9018, U.S.). According to the instructions of manufacturer, approximately 1-3 µg of RNA and m6A spike-in control mixture was used in a single experiment. RNA was heated for 5 min at 65°C and then stored on ice. 300 µL of immunoprecipitation solution system reacted for 2h at 4°C. 20 µL of pre-coated mouse IgG magnetic beads were added into the IP solution system and then incubated at 4°C overnight on a vertical mixer. The EP tube was placed on the magnetic stand for 10 minutes until the magnetic beads were all adsorbed to the tube wall. The supernatant was collected when the solution became transparent. We then washed with 500 µL of IP buffer three times. For elution, we added 200 µL Elution buffer (100 mM tris, PH 7.4, 1 mM EDTA, 0.05% SDS), 4 µL proteinase, and 2 µL RNase inhibitor for 1h at 50°C. The same volume of phenol-chloroform (phenol: chloroform: isoamyl alcohol = 25: 24: 1) was added into the supernatant and IP samples, shaken vigorously, then rested for 3 min. Following centrifuging for 10 min at 12000g, the supernatant was collected, added into 3 µL glycogen, 20 µL 3 M NaAC and 50 µL iced absolute ethanol, then was placed at -20°C for 30 min. After being centrifuged at 15000 g for 10 min, the system was washed using 80% ethanol, then the sample was dissolved in 20 µL ddH<sub>2</sub>O.

### **m6A single-base validation using ligase-based method**

Single-base validation using the ligation-amplification method was performed as described previously (3). Briefly, 1000 ng of processed RNA was first prepared. The mixture A (20 nM

probe L, 20 nM probe R, 1× ligation buffer (NEB) and 1000 ng treated RNA) was configured. After configuration, the mixture was incubated for 3 minutes at 85°C, then cooled to 35°C for 10 minutes. Mixture B was added after configuration to a volume of 20 µL. Then it was left in room temperature for 10 min and set aside. QRT-PCR was performed on the sites of Ct, respectively. All data were calculated by the formula:  $m6A\% = [(2 - Ct \text{ unmethylated}) - (2 - Ct \text{ methylated site})] / (2 - Ct \text{ unmethylated}) \times 100 \%$ . The probes and PCR primers used in this experiment were respectively listed in Supplementary Table 4 and Supplementary Table 5.

### **Fluorescence in situ hybridization (FISH)**

The RNA FISH probe mix was purchased from RiboBio (Guangzhou, China). All FISH probe sequences are unavailable due to commercial patent protection. Multiple probes were designed to target BLACAT3, 18S rRNA and U6 sequences to improve the fluorescence signal-to-noise ratio. To provide optimal signal intensity, each set of 15-20 probes could cover the entire length of the RNA molecule, and each probe carried multiple fluorophores. FISH probes were stored in RNase-free stock solution at -20°C, protected from light. The experimental steps were implemented in accordance with the protocol provided by the manufacturer. Cell nuclei were stained with DAPI and images were collected using the confocal microscope ZEISS LSM 900 (Carl Zeiss AG, Germany).

### **RNA pull-down assay and MS**

The pre-experimental preparations included the extraction of total protein, the preparation of BLACAT3 cDNA template, and biotin labeling. First, a combined reaction was performed

between streptavidin magnetic beads and labeled sense or anti-sense probes. Then, the RNA-magnetic beads were labeled and protein was bound. Master mix of RNA-protein binding reaction was prepared and added into the above protein complex and incubated at room temperature for 2 hours. Finally, the RNA-binding protein complexes were rinsed and eluted for silver staining SDS-PAGE and MS analysis.

### **RNA immunoprecipitation (RIP) assay**

RNA-binding protein immunoprecipitation was performed after obtaining cell lysates. 300  $\mu$ L supernatant was pipetted into an EP tube. 2  $\mu$ g anti-ZONAB antibody was added and the sample was incubated at 4°C for 2 hours. Next, we added 50  $\mu$ L of protein A/G magnetic bead suspensions and incubated overnight at 4°C. Then, we place the EP tube on the magnetic stand, and discarded the supernatant. We added 500  $\mu$ L RIP Wash Buffer, put the EP tube on the magnetic rack after spin washing, discarded the supernatant, and washed four times. RNA purification was then carried out. Here, we added 1  $\mu$ L proteinase K and 150  $\mu$ L Wash Buffer to the magnetic bead-antibody complex and incubated at 55°C for 30 min to remove the protein. After incubation, we placed the EP tube on a magnetic stand, aspirated the supernatant into a new EP tube, and added 250  $\mu$ L of RIP Wash Buffer. Then we used phenol: chloroform: isoamyl alcohol to extract RNA. Finally, we removed the supernatant, dried the RNA precipitate and then added 20  $\mu$ L DEPC water to dissolve the RNA. After concentration quantification using Nanodrop, the RNAs were reverse transcribed into cDNA and performed qRT-PCR analyzing. The antibody and primers used in this experiment were respectively listed in Supplementary Table 3 and Supplementary Table 5.

### **Dual-luciferase reporter assay**

The reporter gene plasmid was constructed and supplied by IBSBIO (Shanghai, China). The detection was performed according to the instructions of the reporter gene detection kit. Cell lysate was obtained after transfection of HEK 293T cells. The fully lysed lysate was centrifuged at 10,000-15,000 rpm for 3-5 min. After centrifugation, the supernatant was transferred to a new EP tube for subsequent detection. The fluorescence detection was conducted according to the instrument manual. We added 20  $\mu$ L of sample and 20  $\mu$ L of Firefly Luciferase Assay Reagent into the tube and measured the RLU after thorough mixing. Then, we added 20  $\mu$ L of the prepared Renilla Luciferase Assay working solution to the sample solution and fully mixed. Finally, the RLU was measured. The activation degree of the reporter gene is determined by the ratio obtained between the sample RLU and standard RLU value. The promoter sequences of NCF2 were listed in Supplementary Table 10.

### **Chromatin Immunoprecipitation (ChIP) assay**

The binding of ZONAB in the promoter region of NCF2 gene was analyzed by ChIP experiments in T24 cells under different treatment conditions. ChIP experiments were performed using Anti-ZONAB antibody, and two pairs of qRT-PCR primers were designed according to the binding site (one pair for the binding site region and one pair for the distal control region) to analyze ZONAB on the NCF2 gene promoter. First, in vitro DNA-protein conjugate cross-linking was carried out. For nucleus preparation, 5 mL of TNT Buffer (10 mM Tris-HCl, 10 mM NaCl, 0.2% Triton X-100, 1 $\times$  protease inhibitor, pH 8.0) were added, and incubated on ice for 10 min. Then

the buffer was centrifuged at 2000 rpm, 4°C, for 5 min, discarding the supernatant, and cell nucleus pellet was stored at -80°C for later use. Nuclear lysis and ultrasonic shearing of chromatin were performed, and the OD value was detected after ultrasonication. Next, immunoprecipitation was performed. After washing, the immunoprecipitation was eluted and cross-linked. The supernatant was discarded, and 30µL ddH<sub>2</sub>O was added after drying. The relative enrichment level of ZONAB in the promoter region of NCF2 gene was detected by qRT-PCR. The antibody and primers used in this experiment were respectively listed in Supplementary Table 3 and Supplementary Table 5.

#### **Haematoxylin and eosin (H&E) staining**

The tissues were sectioned for subsequent staining after the steps of sampling, fixing, dehydration and wax-embedding. H&E staining was performed as previously described. All the slides were scanned using panoramic digital pathology scanners (3D HISTECH, Hungary), and pictures were processed using CaseViewer (3D HISTECH, Hungary).

#### **Immunofluorescence (IF) and Immunohistochemical (IHC) staining**

The experiments were performed based on the protocols previously described. Before the experiment started, the paraffin slides were sequentially processed by dewaxing, antigen retrieval, and serum blocking. For IF staining, it generally went through the steps of primary antibody reaction, secondary antibody reaction, reaction amplification, addition of phalloidin, DAPI counterstaining of nuclei, and sealing. For IHC staining, an additional diaminobenzidine reaction is added on the basis of the IF staining. All the slides were scanned using panoramic

digital pathology scanners (3D HISTECH, Hungary), and pictures were processed using CaseViewer (3D HISTECH, Hungary). All the antibodies used in IF and IHC stainings were listed in Supplementary Table 3.

## REFERENCES

1. Li F, Zhang H, Wang W, Yang P, Huang Y, Zhang J, et al. T cell receptor  $\beta$ -chain-targeting chimeric antigen receptor T cells against T cell malignancies. *Nature communications*. 2022;13(1):4334.
2. Chang M, Gao F, Chen J, Gnawali G, Wang W. MDM2-BCL-X(L) PROTACs enable degradation of BCL-X(L) and stabilization of p53. *Acta materia medica*. 2022;1(3):333-42.
3. Zhang Z, Chen LQ, Zhao YL, Yang CG, Roundtree IA, Zhang Z, et al. Single-base mapping of m(6)A by an antibody-independent method. *Science advances*. 2019;5(7):eaax0250.

**SUPPLEMENTARY TABLES**

**Supplementary Table 1. Patient characteristics for m6A microarray analysis (n = 3).**

| Patient ID | Gender | Age(y) | Histopathological Type | Grade | TNM stage |
|------------|--------|--------|------------------------|-------|-----------|
| P1(D****9) | Male   | 71     | Urothelium carcinoma   | III   | T2bN0M0   |
| P2(D****6) | Male   | 67     | Urothelium carcinoma   | III   | T4aN0M0   |
| P3(D****4) | Male   | 63     | Urothelium carcinoma   | III   | T3aN2M0   |

**Supplementary Table 2. Characteristics of patient from local hospital (n = 104).**

| Variable              | Frequency | BLACAT3 expression |      | Pearson Chi-square | P value |
|-----------------------|-----------|--------------------|------|--------------------|---------|
|                       |           | Low                | High |                    |         |
| <b>Total</b>          | 104       | 52                 | 52   |                    |         |
| <b>Gender</b>         |           |                    |      |                    |         |
| Male                  | 73        | 39                 | 34   | 1.149              | 0.284   |
| Female                | 31        | 13                 | 18   |                    |         |
| <b>Age(y)</b>         |           |                    |      |                    |         |
| 46-75                 | 68        | 40                 | 28   | 6.118              | 0.013   |
| 76-90                 | 36        | 12                 | 24   |                    |         |
| <b>Marital status</b> |           |                    |      |                    |         |
| Married               | 63        | 35                 | 28   | 1.973              | 0.160   |
| Solo living           | 41        | 17                 | 24   |                    |         |
| <b>Tumor grade</b>    |           |                    |      |                    |         |
| Low (I/II)            | 4         | 1                  | 3    | 0.260*             | 0.610   |
| High (III/IV)         | 100       | 51                 | 49   |                    |         |
| <b>Tumor stage</b>    |           |                    |      |                    |         |
| Tis/T1                | 2         | 2                  | 0    | 0.510*             | 0.475   |
| T2-T4                 | 102       | 50                 | 52   |                    |         |
| <b>L.N. status</b>    |           |                    |      |                    |         |
| Negative              | 98        | 52                 | 46   | 4.422*             | 0.035   |
| Positive              | 6         | 0                  | 6    |                    |         |
| <b>TNM stage</b>      |           |                    |      |                    |         |
| Ois/I/II              | 86        | 49                 | 37   | 9.674              | 0.002   |
| III/IV                | 18        | 3                  | 15   |                    |         |

\*Correction for continuity

**Supplementary Table 3. Antibody list**

| Antibody Name                   | Manufacturer              | Catalog Number | Application              |
|---------------------------------|---------------------------|----------------|--------------------------|
| anti-m6A                        | Synaptic Systems          | 202003         | m6A IP                   |
| anti-m6A                        | ZEN-BIOSCIENCE            | 517924         | m6A dot blot (1:1000)    |
| anti-ALKBH5                     | Abcam                     | ab195377       | WB (1:1000)              |
| anti-GAPDH                      | Abcam                     | ab181602       | WB (1:10000)             |
| anti-Ki67                       | Proteintech               | 27309-1-AP     | IF (1:16000)             |
| anti-CD31                       | Proteintech               | 28083-1-AP     | IF (1:2000)              |
| anti-NCF2                       | Abcam                     | ab109366       | IHC (1:100), WB (1:1000) |
| anti-YBX3/ZONAB                 | Bethyl Laboratories       | A303-070A      | WB (1:1000), IP (1:100)  |
| anti-Lamin B                    | Abcam                     | ab32535        | WB (1:500)               |
| anti-E-Cadherin                 | Proteintech               | 20874-1-AP     | WB (1:5000)              |
| anti-N-Cadherin                 | Abcam                     | ab245117       | WB (1:1000)              |
| anti-Vimentin                   | Abcam                     | ab92547        | WB (1:1000)              |
| anti-NF- $\kappa$ B p65         | Abcam                     | ab16502        | WB (1:1000), IHC (1:100) |
| anti-Phospho-NF- $\kappa$ B p65 | Cell Signaling Technology | #3033          | WB (1:1000), IHC (1:800) |
| anti-VEGFA                      | Abcam                     | ab46154        | WB (1:1000)              |
| anti-VEGFA                      | Abcam                     | Ab1316         | IHC (1:100)              |

**Supplementary Table 4. Probes used in this study**

| Probe name | Sequences                                                                                     | Application                |
|------------|-----------------------------------------------------------------------------------------------|----------------------------|
| NC         | L1: po4GCGGAACCACTATACACAGCCGAAGAACCTTTACC<br>R1: TCTGGTGGCATCACTCATCTGAACATCCCAAGGrTrU       | Single-base mapping of m6A |
| BLACAT3    | L1: po4CCGGGCGCCCATCAATAACAACACGGTAGCAGGAGT<br>R1: ACCTGGACCACTTGGAACATATTGCTACATCAGCCCCArGrU |                            |



**Supplementary Table 5. Primer sequences used in this project.**

| Gene name         | Primer sequences                                                        | Application   |
|-------------------|-------------------------------------------------------------------------|---------------|
| ENST00000439898.1 | F: 5'- GCCTGGTCAGTGGCATAG-3'<br>R: 5'- GATTGGGGTCAGTTTTGG-3'            | MeRIP qRT-PCR |
| BLACAT3           | F: 5' -CCCAACAATCTGTGTTTAACAA-3'<br>R: 5'- ATCCCGAGATCATCCAAATC-3'      | MeRIP qRT-PCR |
| BLACAT3           | F: 5' -CGACCTCTGACACATAGGATCTG-3'<br>R: 5' -ACAGAGGAATTGGAAAAGAAGCTC-3' | qRT-PCR       |
| METTL3            | F: 5' -TTGTCTCCAACCTTCCGTAGT-3'<br>R: 5' -CCAGATCAGAGAGGTGGTGTAG-3'     | qRT-PCR       |
| METTL14           | F: 5' -AGTGCCGACAGCATTGGTG-3'<br>R: 5' -GGAGCAGAGGTATCATAGGAAGC-3'      | qRT-PCR       |
| WTAP              | F: 5' -CTTCCCAAGAAGTTTCGATTGA-3'<br>R: 5' -TCAGACTCTCTTAGGCCAGTTAC-3'   | qRT-PCR       |
| ALKBH5            | F: 5' -CGGCGAAGGCTACACTTACG-3'<br>R: 5' -CCACCAGCTTTTGGATCACCA-3'       | qRT-PCR       |
| FTO               | F: 5' -ACTTGGCTCCCTTATCTGACC-3'<br>R: 5' -TGTGCAGTGTGAGAAAGGCTT-3'      | qRT-PCR       |
| GAPDH             | F: 5' -GGACCTGACCTGCCGTCTAG-3'<br>R: 5' -GTAGCCCAGGATGCCCTTGA-3'        | qRT-PCR       |
| U6                | F: 5'-CGCTTCGGCAGCACATATACTA-3'<br>R: 5'-TCACGAATTTGCGTGTCATCCT-3'      | qRT-PCR       |
| YBX3              | F:5'-ACCGGCGTCCCTACAATTAC-3'<br>R:5'-GGTTCTCAGTTGGTGCTTCAC-3'           | qRT-PCR       |
| NCF2              | F: 5'-CCAGAAGCATTAAACCGAGACAA-3'<br>R: 5'-CCTCGAAGCTGAATCAAGGC-3'       | qRT-PCR       |
| NCF2 Primer1      | F: 5'-GGCATAGCGGGAGAAGAGTAA-3'<br>R: 5'-TATCCCACCCTGACACTCAGA-3'        | ChIP qRT-PCR  |
| NCF2 Primer2      | F: 5'-AGTGAGCAAGGAATTCATTCAAG-3'<br>R: 5'-CCTTGATTTCCACACCCTTGT-3'      | ChIP qRT-PCR  |

**Supplementary Table 6. Sequences of siRNAs and shRNAs oligos used in this project**

| siRNAs/shRN<br>As | Sense (Forward oligos)                                                        | Antisense (Reverse oligos)                                                |
|-------------------|-------------------------------------------------------------------------------|---------------------------------------------------------------------------|
| siControl         | 5'-UUCUCCGAACGUGUCACGUTT-3'                                                   | 5'-ACGUGACACGUUCGGAGAATT-3'                                               |
| siMETTL3#1        | 5'-GCAAGUAUGUUCACUAUGAAA-3'                                                   | 5'-UCAUAGUGAACAUACUUGCAG-3'                                               |
| siMETTL3#2        | 5'-GACUGCUCUUUCCUUAAUAAU-3'                                                   | 5'-UAUUAAGGAAAGAGCAGUCUU-3'                                               |
| siMETTL14#1       | 5'-GGAUGAGUUAAUAGCUAAAUC-3'                                                   | 5'-UUUAGCUAUUAACUCAUCCUU-3'                                               |
| siMETTL14#2       | 5'-GCAUUGGUGCCGUGUAAAUU-3'                                                    | 5'-UUUAACACGGCACCAUUGCUU-3'                                               |
| siWTAP#1          | 5'-GCUUUGGAGGGCAAGUACAUU-3'                                                   | 5'-UGUACUUGCCCUCCAAAGCUU-3'                                               |
| siWTAP#2          | 5'-CUAAGAGAGUCUGAAGAAAUU-3'                                                   | 5'-UUUCUUCAGACUCUCUUAGUU-3'                                               |
| siFTO#1           | 5'-GGUUCACAACCUCGGUUUAGU-3'                                                   | 5'-UAAACCGAGGUUGUGAACCGG-3'                                               |
| siFTO#2           | 5'-GGAUGACUCUCAUCUCGAAGG-3'                                                   | 5'-UUCGAGAUGAGAGUCAUCCUC-3'                                               |
| siALKBH5#1        | 5'-GCUGCAAGUUCAGUUCAAGC-3'                                                    | 5'-UUGAACUGGAACUUGCAGCCG-3'                                               |
| siALKBH5#2        | 5'-GCGCCGUCAUCAACGACUACC-3'                                                   | 5'-UAGUCGUUGAUGACGGCGCUG-3'                                               |
| siYBX3#1          | 5'-GCAAUAAAGUGGAAGACUAAAC-3'                                                  | 5'-UAGUCUUCACUUUAUUGCUU-3'                                                |
| siYBX3#2          | 5'-GCAGAGCAGUGCUGAGUAAUU-3'                                                   | 5'-UUACUCAGCACUGCUCUGCUG-3'                                               |
| siYBX3#3          | 5'-GGAUGGAGUUCUGUGGAAGG-3'                                                    | 5'-UCCACAGGAACUCCAUCCGG-3'                                                |
| siNCF2#1          | 5'-CACUCAAGGUGCACUACAAGU-3'                                                   | 5'-UUGUAGUGCACCUUGAGUGUG-3'                                               |
| siNCF2#1          | 5'-CGGUAGUCAUGAAGACUCAGC-3'                                                   | 5'-UGAGUCUUAUGACUACCGUG-3'                                                |
| siNCF2-3          | 5'-CCAAGGAGUAAGUACAAUUU-3'                                                    | 5'-AUUUGUACUUACUCCUUGGUU-3'                                               |
| shScramble        | 5'-CCTAAGGTTAAGTCGCCCTCG-3'                                                   | 5'-CGAGGGCGACTTAACCTTAGG-3'                                               |
| shBLACAT3#1       | 5'-<br>CCGGCATAGGATCTGGAGATTAAAGCT<br>CGAGCTTTAATCTCCAGATCCTATGTTT<br>TTG-3'  | 5'-<br>AATTCAAAAAGGGTATAGTGGTTCCGCAACC<br>CTCGAGGGTTGCGGAACCACTATACCC-3'  |
| shBLACAT3#2       | 5'-<br>CCGGGGGTATAGTGGTTCCGCAACCC<br>TCGAGGGTTGCGGAACCACTATACCCCT<br>TTTTG-3' | 5'-<br>AATTCAAAAAGGGTATAGTGGTTCCGCAACC<br>CTCGAG GGTGCGGAACCACTATACCC-3'  |
| shBLACAT3#3       | 5'-<br>CCGGGCTGCTCTGCTAATAATTAGGCT<br>CGAGCCTAATTATTAGCAGAGCAGCTT<br>TTTTG-3' | 5'-<br>AATTCAAAAAGCTGCTCTGCTAATAATTAGGC<br>TCGAG CCTAATTATTAGCAGAGCAGC-3' |

**Supplementary Table 7. Experiment Workflow of Human m6A-mRNA&IncRNA  
Epitranscriptomic Microarray (Supplied by Aksomics Inc, China)**

**RNA Sample QC**

The purity and amount of total RNA samples were determined with NanoDrop ND-1000. Results were provided in Sample QC report.

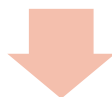

**m6A Immunoprecipitation**

Total RNAs were immunoprecipitated with anti-N6-methyladenosine(m6A) antibody. The immunoprecipitated "IP" fraction contained enriched m6A methylated RNAs, and the supernatant " Sup" fraction contained unmodified RNAs.

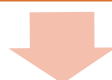

**Two-color RNA Labeling**

"IP" and "Sup" RNAs were amplified as cRNAs and labeled with Cy5 and Cy3 respectively using Arraystar Super RNA Labeling Kit.

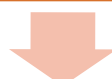

**Array Hybridization**

Cy3 and Cy5 labeled cRNAs were combined together and hybridized to Arraystar Human mRNA&IncRNA Epitranscriptomic Arrays (8x60K, Arraystar) at 65°C for 17 hours in an Agilent Hybridization Oven.

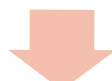

**Array Scanning**

After washing, slides were scanned with Agilent Scanner G2505C.

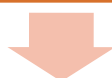

**Data Processing and Analysis**

**Supplementary Table 8. Flowchart of m6A Microarray Data Analysis  
(Supplied by Aksomics Inc, China)**

**Raw Data Extraction**

Data was extracted using Agilent Feature Extraction software. The probe signals passing "P" or "M" QC flags in at least 1 sample were retained for further analysis.

**"m6A methylation level" and "RNA expression level" Calculation**

IP (Cy5-labelled) and Sup (Cy3-labelled) intensities were normalized by the RNA spike-in calibration controls. The m6A methylation levels were calculated for the percentage of modified RNA of a transcript. The RNA expression levels were calculated by total of modified and not modified RNA of a transcript.

**"m6A quantity" Calculation**

IP (Cy5-labelled) intensities were normalized as relative intensities by the RNA spike-in calibration controls. The normalized IP intensities represent the "m6A quantity" of the transcript comparable across samples.

**Differentially m6A-methylated or expressed mRNAs, lncRNAs and other ncRNAs**

Differentially m6A-methylated or expressed mRNAs, lncRNAs and other ncRNAs based on "m6A methylation level", "m6A quantity" and "RNA expression level" passing fold change and statistical significance cutoffs were identified and compiled.

**Further data analysis**

Hierarchical clustering heatmap analysis was performed for differentially m6A-methylated or expressed RNAs. Differentially m6A-methylated or expressed mRNAs were analyzed for GO and pathway enrichment.

**Supplementary Table 9. Full-length cDNA sequences of two candidate lncRNAs from m6A Microarray data**

---

**> BLACAT3/ENST0000591116.5/LINC01535-204 cDNA: lncRNA 815bp**

---

AGGCGCACGGCGGGUUAUAGUGGUUCCGCAACCUUGGGAUGUUCGGCUGAGCGCCU  
GCCUAACAUGGGAGCGCCUGCCUAACCCUCCUGACUGGAGGGUCAGCGGCGGGGA  
GUCCUGGCCUUAUCUGGCCAUCGCCACGGCAGAAACUGGGGCCCGGGCUGCGUC  
CAGGCCCUUCCCCGUCCGUCCACAGGUCUCAUGGGCGCCCGGACUGGGGCUGAUG  
UAGUUUCCCGACCUCUGACACAUAGGAUCUGGAGAUUAAAGCUGCUCUGCUAAUAA  
UUAGGUUCCCACCUCUCAAGAUCAUUAGGAGCUUCUUUCCAAUUCUCUGUUUUU  
CAUGCAUUGGAAGGAUCUGGAGCUCAGGACCCACUACCUCGCCCGGCCACUGCAA  
GCUUGAACAUUUGAUGGUGGACACCCUCCUGACUUUGUAUUUAUGAUUCACAGGC  
UGCUCGCCAGAAUACUGAAGAAGAAACUCUAGGAGUGAGACCCAACAUCUGUGUU  
UAACAAGUCCCCAGGCCCGUGGAUCCUCCUGGAAUCCUGAUCCUGUUGCUCUCC  
UGGCGGAGUUUUCUAGUCCUCUUAUCUUGAAGCAUGUCUUUCAGAGCCCGGCACC  
ACCAAGUUGGGUAUCUGAUACCCCAUCAGCCUGAGUCUCUUAAGGCCUUUAUAC  
ACAUUUGUCUACACAUAGGGAUUUGGAUGAUCUCGGGAUCCACAUCUCGCUGUC  
CCUGUCCCCCACAACAUCACCAAUACCUUUCUGAAGUUUUCUAGUCCUC  
CUUUUUGUUUGUGGUCCUUAAGCCCAGCCCAUGCCU

---

**> ENST0000439898.1 cDNA: lncRNA 2625bp**

---

GGGGTCGGCGCCGCGGAGGGCGGGGAGGGAGGGTTGGAGGGTTGAGCCAGA  
GACCCGGGACCCCGTCCCCGCACACCTGCCAGTGCCCCGTAGCTTCGGCCGCGGGC  
ACTGGCAGGAGATGAAAGGCTGCTGCCGCCCGGTCCGAAGGACATCGGCGCCCCC  
AGGCCCGTCCCCGCCCAGTTCCTCGGGCCTTTCCTGCTGCCCTGCCTGCGAGG  
GCCGACGACACGGAGAACAGGATCCTGCGCCCAACCCAGGTCCCCGCCTTCTTTAG  
AGGCCCAGGCCTGGACCCCGCTGAGCCGCAGATGTGCGAGCAGGAGCGCCAGAGC  
CCCGATGCCCGCCAGCAGGAAGCGGGCGGGAGATGGTTCCTTCTTCTGTCTGAG  
GGGAACCCTGCACAGAGGGACCATTGAGGGCCTGGCATTGTCTGCCTAACTCACCC  
AGTGCCCTCCCTCCCTGGGTGGGCCATGCGGGGCCTTGACAGGATTGCCCTGGTGCC  
GTCTTGGCAGTGGGTCTGGGTGGGATCCTGGGGGCAGGGCTTCCCTGAGTGCAGAC  
AGCTAGGCCTCCACCTGCCCGGCCTCCACCCAGGCTCAGATTTCCAGGGCATAAG  
GCTCCATTGTCCCAGCACTGGTGGAGGCGGCCTGTCAATTCAGCCTTGTGTTTGGTG  
GTTGGGAAATTCCCAGCCATGGGGGGCTGCAGGCAGGAAGGGGCTGCCAGGTGTC  
CTGCACCCCAACTGAAGGGACTCCATGAGGTTGGTTCCTGGGCATCCCCTGCTGCCT  
GGAGCTGTCCCAGGCTGGACCTCAACCATTCAACCCTCAGGAGCAGTTGGGTGA  
GGAGCACCAGAAATTCATGCTCCCTGGCGCTGCATCCCAGAGCCCTCCCAGCCTA  
AGAAGCCCCATCTTTCTGTCTCCACGCATGGAGAAGTGCAGCTGTGAGGCCAGGAC  
CCTTAGCAGGACATGCAGAGCTGGGCAGGACCCAGGCTCATGCTCCCAGCGTGGG  
GTGAGTTGTCTCCAGCCTGTGGAGACTGCCATGAAGTTGATCTGCCTCCCAGAGGGC  
CTGGCCCACTTCAAATAATTGCTCCGGCTACTGATGTGGTGGGAACCTTTGGTATTTTA  
ACCCATTTGGGGGGTGGGGGAGCAGCTAGGAAGAGAGAGGCAAGCTTTCAGAGTCA  
GAGAGGCCTGAGAGAGGAGAGTAGAGGGAACTCAGTGAGGAGGAGCCAGGCAGGC  
TGCCTCGGTAGTTCCCAGGCCTAGACACCCCCCTGTACCACCCCTGTCCCAGCA  
GGTAGGTGCAGACCTAGATGCCAGGTGCAGAAGGGGGAAAGGGCCCTCTCCAGGGT  
TACAGCAGGGATCACCGAGGCTGCAGGGGCTGCCAAGGCCTGGAAGAAGTCCCATGT

---

---

TCCAGGGAGCCCCATGGCTTCTGATGTCAGGAAAACCTTAGTCCTCTCAGTTCCCCAGA  
ATCATTTACCCCCACCCACCCAAACTGAGTGGCAAACCAGTTGAGTAGAGAATACAA  
GCCCTGACTCCAGCTGCCTGGTCAGTGGCATAGCCAGCCAAGTCCTAGCAACCCTAG  
GAGTCAGGGAGTCAGGGAGGAGGCAAGGACAAGACTACAGTATTGTTTGGCTGAGTT  
CTGGGTCTGGCCCCACTCCCCAAAACCTGACCCCAATCTCTGTGTCTGCTGCCCTAAAA  
AGAGACCCTGGGGCTGGGTGTGGTGGCTCACGCCTGTAATCCTAGCACTTTGGGAGG  
CCAAGGTGGGCGGATCACTTGAGATCAGGAGTTCAAGACCAGCCTGGCCAACATGGT  
GAAACCCCGTCTCTACTAAAATACAAAAATTAGCTGGGCATGATGACGGGTGCCTGTAA  
TCCCAGCTACTCAGGAGGCTGAAACAGGAGAATCACTTGAACCCAGGAGACGGTGGT  
TGCAGTGAGCCAAGATTGTGCCACTGCACTCTAGCCTAGGTGGCTGAGCGAGACTCC  
ATCTCAAAAAAATAAATAAAAAGGAGACCCTGACTGGATGTAGTGGCTCATGCCTTAATCC  
CAGCACTTTTGGAGGCCAAGGCAGGAGGATCACTTGAGGCCAAAAGTTTGAGACCAG  
CCTGGGCAACATAGCAAGACCCCGTCTCTTAAAAACAAAAGATCCTAGCGGTCTCATC  
TCTACCATGGACTACCAGAGGGAAGGCAGCACCTCTCATCACCCAGGGGGATGGCCT  
CCAGTCAGCTGGGTGGGGAACACAGAGCCCTGCCCAGAGGCTTGAACCTGGCACCA  
CAGGGGTCTGGAATTACACAGAAGACGGGTGACAGCCAAGGTGGATCATGAACGGTG  
AGAAGTCCAGCAGGTGACAAGGGGAAGGGTCTAAAGGGTGGAGGGCACAGCGCAAG  
CAAAGTCTTGGCAACAAAAGAGCTAATGCATCCCAGAAATGGGGCAGGTGGAGTACTG  
GAAGCTACACCAAGCTTCAGAGTGGTCCTGTGGCCTCGGTGTGGTAGCTCAGGCCTAT  
AATTCCAACACTTTGGGAGGCTGAGGCAGGAGGAGGATAACTTGAACCCAGGAGTTCA  
AGATCAGCCTGGGCAACATAGTGAGACCTCCATTTTACAAAAAATACAAAAATTAAGT  
TG

---

**Supplementary Table 10. The promoter sequences of NCF2**

---

ggcatagcgggagaagagtaagcagcagagttgtatgggattgtgaaggaaagtctggggataaggctagaaaagtcttg  
gcagtcagattaaggagagttctgagtgacaggggtgggataataggaggggcaaaaacatttttaaaaatgaagtctaatttagc  
tacaaatccatttggtttctcaggaataattaatgtgctattcaagtcctgattatttactagatggaatagcaatacctcttctg  
ccatcactgctacctgcaggtcattaccaatgatttctaatttctttagaatgtatccctcatcatgtattgagtatctgtgctagaga  
tctagaatgaaaaggcatggtcccaactccaaggagcccatgaattgagcagataaagagataaattgcagtaagtatgat  
gcaagttttgggtaaagggtgtacaaggagaggaaaattctctactaccagagttcagggctagatttagcacagttggtg  
acatttaaactgggcttgaaagatgagtaggagttgccaggcaagaagagagctgggaaggccttgtaaacacaggaa  
aacaatctggacaaagacacacatgtcttctaattctcacacctcaatctacaagcactgtggagtatacattttaagttttatt  
tcaggcttttaggggaagcttggtgataatgagtgaaattcttcagttgctacaaaacaagagtttgcataagatttgaccccc  
taaactgcattttacctaaaaagaagcctggattttagcaagccaaattggctatacccttaccaccagttattctctgggagg  
tttactgattttactttctggaaaagcaaggaaagaactcttaaatctgtttttcagagactagtaaaccattagtcacagtgca  
ggactttcatcttcaattttcactggaagatgggagaagtcataattcactgtcatgtggctcccaatttgacatttgacaggaaa  
ttggtcccctgaacttcatgaatgtcataaaagttatttcggctggcagcgggtggctcactcctgtaatcccagcactttgaggg  
gaggccgaggaggccgaatcacctgaggtcaggagttcgagacctcagcctggccaacatggtgaaaccccatctctact  
aaaaatacaaaaattagcagggcgtggtggcaggcttctgtaatcccagctactcaggaggctgaggcaggagaattgctg  
aaccaggaggcagaggttcaatgagctgagatcgtgtcactgcattccagcctgggcaacaagagtgaaactccgtctca  
aaaaaaaaaaaaaaaaagttatttcaggcccagatcagatggatctcaaagattatcctgtctcaaaaattgttaatgataat  
ttcagctcaagataaacactaacatattaatacagcctatgggattacaaaaaagtgagcaaggaattcattcaagactggaa  
agaattatcctctcatctgacactcccatttaacaaggggtggaaatcaaggcccagtgacacaggatttttcTCCATCAct  
ttgaagccaggaacctctggctggtgacaccctgccagcctcagtgggccacactacctgctgcaggagatggcctgcc  
actggcctgggtggggagtttattgagtgatgaaaacagcttctcagtgaggaggggatgcaggggtggtcccctacccaaa  
ggcaggaaagtccccccagtcgggtgagctggggctttatgggctcagaataggggaggggagggacataggtagtact  
ggaaaaggcaacattcaattggttaaaaggcattagtcagaaataattaattgggaaagagcagacaaacaggaacagaa  
gttctcactctaggtcacgggttctattgggaccagtagcCTAGTCTTTCAGCCTTCAGGCTGTTTTTGGCT  
TGAAGCTCTCTTGGCTCCTAGTTTCTACCTAATCATGTCCCTGGTGGAGGCCATCAGC  
CTCTGGAATGAAGGGGTGCTGGCAGCGGACAAGAAGGACTGGAAGGGAGCCCTGGA  
TGCCTTCAGTGCCGTCCAGGACCCCCACTCCCGGATTTGCTTCAACATTGGCT

---

**Supplementary Table 11. BLACAT3-linked proteins in RNA pull-down assay**

|    | Accession | Description                                                                 |
|----|-----------|-----------------------------------------------------------------------------|
| 1  | Q5VTE0    | Putative elongation factor 1-alpha-like 3                                   |
| 2  | P26599    | Polypyrimidine tract-binding protein 1                                      |
| 3  | P27824    | Calnexin                                                                    |
| 4  | P14866    | Heterogeneous nuclear ribonucleoprotein L                                   |
| 5  | Q9Y6M1    | Insulin-like growth factor 2 mRNA-binding protein 2                         |
| 6  | P04843    | Dolichyl-diphosphooligosaccharide-protein glycosyltransferase subunit 1     |
| 7  | Q9P0L0    | Vesicle-associated membrane protein-associated protein A                    |
| 8  | P16989    | Y-box-binding protein 3                                                     |
| 9  | Q12906    | Interleukin enhancer-binding factor 3                                       |
| 10 | Q00839    | Heterogeneous nuclear ribonucleoprotein U                                   |
| 11 | P04844    | Dolichyl-diphosphooligosaccharide-protein glycosyltransferase subunit 2     |
| 12 | Q7Z2W4    | Zinc finger CCCH-type antiviral protein 1                                   |
| 13 | Q12905    | Interleukin enhancer-binding factor 2                                       |
| 14 | P31327    | Carbamoyl-phosphate synthase [ammonia] mitochondrial                        |
| 15 | Q9NZB2    | Constitutive coactivator of PPAR-gamma-like protein 1                       |
| 16 | Q96AG4    | Leucine-rich repeat-containing protein 59                                   |
| 17 | P22626    | Heterogeneous nuclear ribonucleoproteins A2/B1                              |
| 18 | P41091    | Eukaryotic translation initiation factor 2 subunit 3                        |
| 19 | Q2VIR3    | Eukaryotic translation initiation factor 2 subunit 3B                       |
| 20 | P43243    | Matrin-3                                                                    |
| 21 | P13010    | X-ray repair cross-complementing protein 5                                  |
| 22 | Q15785    | Mitochondrial import receptor subunit TOM34                                 |
| 23 | O95292    | Vesicle-associated membrane protein-associated protein B/C                  |
| 24 | P09914    | Interferon-induced protein with tetratricopeptide repeats 1                 |
| 25 | Q08211    | ATP-dependent RNA helicase A                                                |
| 26 | Q07065    | Cytoskeleton-associated protein 4                                           |
| 27 | O95786    | Probable ATP-dependent RNA helicase DDX58                                   |
| 28 | Q13765    | Nascent polypeptide-associated complex subunit alpha                        |
| 29 | E9PAV3    | Nascent polypeptide-associated complex subunit alpha muscle-specific form   |
| 30 | P60468    | Protein transport protein Sec61 subunit beta                                |
| 31 | P30443    | HLA class I histocompatibility antigen A-1 alpha chain                      |
| 32 | P30455    | HLA class I histocompatibility antigen A-36 alpha chain                     |
| 33 | P46977    | Dolichyl-diphosphooligosaccharide-protein glycosyltransferase subunit STT3A |
| 34 | P14868    | Aspartate--tRNA ligase cytoplasmic                                          |
| 35 | Q99729    | Heterogeneous nuclear ribonucleoprotein A/B                                 |
| 36 | P02545    | Prelamin-A/C                                                                |
| 37 | P62280    | 40S ribosomal protein S11                                                   |
| 38 | P62244    | 40S ribosomal protein S15a                                                  |
| 39 | Q53GQ0    | Very-long-chain 3-oxoacyl-CoA reductase                                     |
| 40 | O15173    | Membrane-associated progesterone receptor component 2                       |
| 41 | P05062    | Fructose-bisphosphate aldolase B                                            |
| 42 | P04083    | Annexin A1                                                                  |



---

|    |        |                                                                              |
|----|--------|------------------------------------------------------------------------------|
| 43 | P62913 | 60S ribosomal protein L11                                                    |
| 44 | P51114 | Fragile X mental retardation syndrome-related protein 1                      |
| 45 | O95793 | Double-stranded RNA-binding protein Staufen homolog 1                        |
| 46 | P39656 | Dolichyl-diphosphooligosaccharide-protein glycosyltransferase 48 kDa subunit |
| 47 | P07814 | Bifunctional glutamate/proline--tRNA ligase                                  |
| 48 | Q15233 | Non-POU domain-containing octamer-binding protein                            |
| 49 | Q9GZZ8 | Extracellular glycoprotein lacritin                                          |
| 50 | P23284 | Peptidyl-prolyl cis-trans isomerase B                                        |
| 51 | Q6PIU2 | Neutral cholesterol ester hydrolase 1                                        |
| 52 | Q9NQC3 | Reticulon-4                                                                  |
| 53 | P16615 | Sarcoplasmic/endoplasmic reticulum calcium ATPase 2                          |
| 54 | P10620 | Microsomal glutathione S-transferase 1                                       |
| 55 | Q15392 | Delta (24)-sterol reductase                                                  |
| 56 | P14625 | Endoplasmin                                                                  |
| 57 | O95758 | Polypyrimidine tract-binding protein 3                                       |
| 58 | O00442 | RNA 3'-terminal phosphate cyclase                                            |
| 59 | O00425 | Insulin-like growth factor 2 mRNA-binding protein 3                          |
| 60 | P29558 | RNA-binding motif single-stranded-interacting protein 1                      |
| 61 | P31689 | DnaJ homolog subfamily A member 1                                            |
| 62 | P61009 | Signal peptidase complex subunit 3                                           |
| 63 | P07205 | Phosphoglycerate kinase 2                                                    |
| 64 | Q9NPA0 | ER membrane protein complex subunit 7                                        |
| 65 | Q9UN86 | Ras GTPase-activating protein-binding protein 2                              |
| 66 | Q96DA0 | Zymogen granule protein 16 homolog B                                         |
| 67 | Q13283 | Ras GTPase-activating protein-binding protein 1                              |
| 68 | P23246 | Splicing factor proline- and glutamine-rich                                  |
| 69 | P51991 | Heterogeneous nuclear ribonucleoprotein A3                                   |
| 70 | Q12797 | Aspartyl/asparaginyl beta-hydroxylase                                        |
| 71 | P00387 | NADH-cytochrome b5 reductase 3                                               |
| 72 | P49755 | Transmembrane emp24 domain-containing protein 10                             |
| 73 | P49368 | T-complex protein 1 subunit gamma                                            |
| 74 | O96005 | Cleft lip and palate transmembrane protein 1                                 |
| 75 | Q13325 | Interferon-induced protein with tetratricopeptide repeats 5                  |
| 76 | Q15046 | Lysine--tRNA ligase                                                          |
| 77 | O75396 | Vesicle-trafficking protein SEC22b                                           |
| 78 | Q8TCJ2 | Dolichyl-diphosphooligosaccharide-protein glycosyltransferase subunit STT3B  |
| 79 | P62906 | 60S ribosomal protein L10a                                                   |
| 80 | P33121 | Long-chain-fatty-acid--CoA ligase 1                                          |
| 81 | P07237 | Protein disulfide-isomerase                                                  |
| 82 | P29692 | Elongation factor 1-delta                                                    |
| 83 | A0FGR8 | Extended synaptotagmin-2                                                     |
| 84 | P0CF74 | Immunoglobulin lambda constant 6                                             |
| 85 | P0DOY2 | Immunoglobulin lambda constant 2                                             |
| 86 | P0CG04 | Immunoglobulin lambda constant 1                                             |

---

---

|     |        |                                                                           |
|-----|--------|---------------------------------------------------------------------------|
| 87  | P0DOY3 | Immunoglobulin lambda constant 3                                          |
| 88  | B9A064 | Immunoglobulin lambda-like polypeptide 5                                  |
| 89  | Q14258 | E3 ubiquitin/ISG15 ligase TRIM25                                          |
| 90  | P17987 | T-complex protein 1 subunit alpha                                         |
| 91  | Q9Y3I0 | tRNA-splicing ligase RtcB homolog                                         |
| 92  | Q16850 | Lanosterol 14-alpha demethylase                                           |
| 93  | P15531 | Nucleoside diphosphate kinase A                                           |
| 94  | Q07666 | KH domain-containing RNA-binding signal transduction-associated protein 1 |
| 95  | Q96AE4 | Far upstream element-binding protein 1                                    |
| 96  | Q96QA5 | Gasdermin-A                                                               |
| 97  | Q9NZI8 | Insulin-like growth factor 2 mRNA-binding protein 1                       |
| 98  | Q00266 | S-adenosylmethionine synthase isoform type-1                              |
| 99  | P12956 | X-ray repair cross-complementing protein 6                                |
| 100 | Q9BTV4 | Transmembrane protein 43                                                  |
| 101 | P62266 | 40S ribosomal protein S23                                                 |
| 102 | P63244 | Receptor of activated protein C kinase 1                                  |
| 103 | P68400 | Casein kinase II subunit alpha                                            |
| 104 | Q8NEV1 | Casein kinase II subunit alpha 3                                          |
| 105 | P01591 | Immunoglobulin J chain                                                    |
| 106 | Q5JQF8 | Polyadenylate-binding protein 1-like 2                                    |
| 107 | Q4VXU2 | Polyadenylate-binding protein 1-like                                      |
| 108 | Q9H361 | Polyadenylate-binding protein 3                                           |
| 109 | P11940 | Polyadenylate-binding protein 1                                           |
| 110 | P12268 | Inosine-5'-monophosphate dehydrogenase 2                                  |
| 111 | Q9BSJ8 | Extended synaptotagmin-1                                                  |
| 112 | Q15365 | Poly(rC)-binding protein 1                                                |
| 113 | Q15366 | Poly(rC)-binding protein 2                                                |
| 114 | P57721 | Poly(rC)-binding protein 3                                                |
| 115 | Q9NZZ3 | Charged multivesicular body protein 5                                     |
| 116 | Q12904 | Aminoacyl tRNA synthase complex-interacting multifunctional protein 1     |
| 117 | Q70UQ0 | Inhibitor of nuclear factor kappa-B kinase-interacting protein            |
| 118 | P49257 | Protein ERGIC-53                                                          |
| 119 | Q15125 | 3-beta-hydroxysteroid-Delta (8) Delta (7)-isomerase                       |
| 120 | P51648 | Aldehyde dehydrogenase family 3 member A2                                 |
| 121 | Q9UI42 | Carboxypeptidase A4                                                       |
| 122 | Q9P035 | Very-long-chain (3R)-3-hydroxyacyl-CoA dehydratase 3                      |
| 123 | Q01130 | Serine/arginine-rich splicing factor 2                                    |
| 124 | Q9BRL6 | Serine/arginine-rich splicing factor 8                                    |
| 125 | P60842 | Eukaryotic initiation factor 4A-I                                         |
| 126 | P50990 | T-complex protein 1 subunit theta                                         |
| 127 | Q6NZI2 | Caveolae-associated protein 1                                             |
| 128 | Q13200 | 26S proteasome non-ATPase regulatory subunit 2                            |
| 129 | Q9Y3E5 | Peptidyl-tRNA hydrolase 2 mitochondrial                                   |
| 130 | Q99878 | Histone H2A type 1-J                                                      |

---

---

|     |        |                                                             |
|-----|--------|-------------------------------------------------------------|
| 131 | Q16777 | Histone H2A type 2-C                                        |
| 132 | Q9BTM1 | Histone H2A.J                                               |
| 133 | Q93077 | Histone H2A type 1-C                                        |
| 134 | P0C0S8 | Histone H2A type 1                                          |
| 135 | Q7L7L0 | Histone H2A type 3                                          |
| 136 | P16435 | NADPH--cytochrome P450 reductase                            |
| 137 | P11586 | C-1-tetrahydrofolate synthase cytoplasmic                   |
| 138 | P78371 | T-complex protein 1 subunit beta                            |
| 139 | P25788 | Proteasome subunit alpha type-3                             |
| 140 | P07910 | Heterogeneous nuclear ribonucleoproteins C1/C2              |
| 141 | O15523 | ATP-dependent RNA helicase DDX3Y                            |
| 142 | O00571 | ATP-dependent RNA helicase DDX3X                            |
| 143 | P46779 | 60S ribosomal protein L28                                   |
| 144 | Q13586 | Stromal interaction molecule 1                              |
| 145 | P04732 | Metallothionein-1E                                          |
| 146 | P02795 | Metallothionein-2                                           |
| 147 | P80297 | Metallothionein-1X                                          |
| 148 | Q8N339 | Metallothionein-1M                                          |
| 149 | P13640 | Metallothionein-1G                                          |
| 150 | Q8TCT9 | Minor histocompatibility antigen H13                        |
| 151 | P12236 | ADP/ATP translocase 3                                       |
| 152 | P05141 | ADP/ATP translocase 2                                       |
| 153 | P12235 | ADP/ATP translocase 1                                       |
| 154 | Q15717 | ELAV-like protein 1                                         |
| 155 | Q5T750 | Skin-specific protein 32                                    |
| 156 | Q16563 | Synaptophysin-like protein 1                                |
| 157 | Q15155 | Nodal modulator 1                                           |
| 158 | P69849 | Nodal modulator 3                                           |
| 159 | Q5JPE7 | Nodal modulator 2                                           |
| 160 | P09913 | Interferon-induced protein with tetratricopeptide repeats 2 |
| 161 | P61254 | 60S ribosomal protein L26                                   |
| 162 | Q9UNX3 | 60S ribosomal protein L26-like 1                            |
| 163 | P01037 | Cystatin-SN                                                 |
| 164 | P01036 | Cystatin-S                                                  |
| 165 | Q9Y4X1 | UDP-glucuronosyltransferase 2A1                             |
| 166 | Q6UWM9 | UDP-glucuronosyltransferase 2A3                             |
| 167 | P06133 | UDP-glucuronosyltransferase 2B4                             |
| 168 | O75795 | UDP-glucuronosyltransferase 2B17                            |
| 169 | Q96L21 | 60S ribosomal protein L10-like                              |
| 170 | P27635 | 60S ribosomal protein L10                                   |
| 171 | O15347 | High mobility group protein B3                              |
| 172 | P41252 | Isoleucine--tRNA ligase cytoplasmic                         |
| 173 | Q86UP2 | Kinectin                                                    |
| 174 | P62899 | 60S ribosomal protein L31                                   |

---

---

|     |        |                                                                            |
|-----|--------|----------------------------------------------------------------------------|
| 175 | P51659 | Peroxisomal multifunctional enzyme type 2                                  |
| 176 | P22735 | Protein-glutamine gamma-glutamyltransferase K                              |
| 177 | P61769 | Beta-2-microglobulin                                                       |
| 178 | P35610 | Sterol O-acyltransferase 1                                                 |
| 179 | Q9H299 | SH3 domain-binding glutamic acid-rich-like protein 3                       |
| 180 | P26038 | Moesin                                                                     |
| 181 | P38159 | RNA-binding motif protein X chromosome                                     |
| 182 | O14879 | Interferon-induced protein with tetratricopeptide repeats 3                |
| 183 | P50402 | Emerin                                                                     |
| 184 | P05166 | Propionyl-CoA carboxylase beta chain mitochondrial                         |
| 185 | O76024 | Wolframin                                                                  |
| 186 | P06748 | Nucleophosmin                                                              |
| 187 | P63000 | Ras-related C3 botulinum toxin substrate 1                                 |
| 188 | P60763 | Ras-related C3 botulinum toxin substrate 3                                 |
| 189 | P15153 | Ras-related C3 botulinum toxin substrate 2                                 |
| 190 | P67812 | Signal peptidase complex catalytic subunit SEC11A                          |
| 191 | P01833 | Polymeric immunoglobulin receptor                                          |
| 192 | Q00610 | Clathrin heavy chain 1                                                     |
| 193 | P00326 | Alcohol dehydrogenase 1C                                                   |
| 194 | P00966 | Argininosuccinate synthase                                                 |
| 195 | P60903 | Protein S100-A10                                                           |
| 196 | P10809 | 60 kDa heat shock protein mitochondrial                                    |
| 197 | P61803 | Dolichyl-diphosphooligosaccharide-protein glycosyltransferase subunit DAD1 |
| 198 | P40926 | Malate dehydrogenase mitochondrial                                         |
| 199 | Q96L46 | Calpain small subunit 2                                                    |
| 200 | P04632 | Calpain small subunit 1                                                    |
| 201 | Q96EP5 | DAZ-associated protein 1                                                   |
| 202 | P62854 | 40S ribosomal protein S26                                                  |
| 203 | Q5JNZ5 | Putative 40S ribosomal protein S26-like 1                                  |
| 204 | Q16378 | Proline-rich protein 4                                                     |
| 205 | P50991 | T-complex protein 1 subunit delta                                          |
| 206 | P62851 | 40S ribosomal protein S25                                                  |
| 207 | Q16658 | Fascin                                                                     |
| 208 | O43402 | ER membrane protein complex subunit 8                                      |
| 209 | Q7KZF4 | Staphylococcal nuclease domain-containing protein 1                        |
| 210 | Q92820 | Gamma-glutamyl hydrolase                                                   |
| 211 | Q9NR12 | PDZ and LIM domain protein 7                                               |
| 212 | Q92499 | ATP-dependent RNA helicase DDX1                                            |
| 213 | O95819 | Mitogen-activated protein kinase kinase kinase kinase 4                    |
| 214 | P30050 | 60S ribosomal protein L12                                                  |
| 215 | O75844 | CAAX prenyl protease 1 homolog                                             |
| 216 | Q13404 | Ubiquitin-conjugating enzyme E2 variant 1                                  |
| 217 | P84090 | Enhancer of rudimentary homolog                                            |
| 218 | Q8N5K1 | CDGSH iron-sulfur domain-containing protein 2                              |

---

---

|     |        |                                                              |
|-----|--------|--------------------------------------------------------------|
| 219 | P15311 | Ezrin                                                        |
| 220 | P63162 | Small nuclear ribonucleoprotein-associated protein N         |
| 221 | P14678 | Small nuclear ribonucleoprotein-associated proteins B and B' |
| 222 | Q9UKS7 | Zinc finger protein Helios                                   |
| 223 | O75635 | Serpin B7                                                    |
| 224 | P08240 | Signal recognition particle receptor subunit alpha           |
| 225 | Q99442 | Translocation protein SEC62                                  |
| 226 | Q14739 | Delta (14)-sterol reductase                                  |
| 227 | Q8N684 | Cleavage and polyadenylation specificity factor subunit 7    |
| 228 | Q9P1U1 | Actin-related protein 3B                                     |
| 229 | P61158 | Actin-related protein 3                                      |
| 230 | P07099 | Epoxide hydrolase 1                                          |
| 231 | P05090 | Apolipoprotein D                                             |
| 232 | O15260 | Surfeit locus protein 4                                      |
| 233 | P53999 | Activated RNA polymerase II transcriptional coactivator p15  |
| 234 | Q8IZH2 | 5'-3' exoribonuclease 1                                      |
| 235 | Q04637 | Eukaryotic translation initiation factor 4 gamma 1           |
| 236 | Q9HB71 | Calcyclin-binding protein                                    |
| 237 | Q01813 | ATP-dependent 6-phosphofructokinase platelet type            |
| 238 | P17858 | ATP-dependent 6-phosphofructokinase liver type               |
| 239 | P08237 | ATP-dependent 6-phosphofructokinase muscle type              |
| 240 | Q96JB3 | Hypermethylated in cancer 2 protein                          |
| 241 | A8MT65 | Zinc finger protein 891                                      |
| 242 | Q9NZD8 | Maspardin                                                    |
| 243 | P09210 | Glutathione S-transferase A2                                 |
| 244 | Q16772 | Glutathione S-transferase A3                                 |
| 245 | P08263 | Glutathione S-transferase A1                                 |
| 246 | Q7RTV2 | Glutathione S-transferase A5                                 |
| 247 | P47914 | 60S ribosomal protein L29                                    |
| 248 | Q8NFW8 | N-acylneuraminate cytidyltransferase                         |
| 249 | P43307 | Translocon-associated protein subunit alpha                  |
| 250 | P47895 | Aldehyde dehydrogenase family 1 member A3                    |
| 251 | P00352 | Retinal dehydrogenase 1                                      |
| 252 | P30837 | Aldehyde dehydrogenase X mitochondrial                       |
| 253 | P05091 | Aldehyde dehydrogenase mitochondrial                         |
| 254 | O94788 | Retinal dehydrogenase 2                                      |
| 255 | Q9H9S3 | Protein transport protein Sec61 subunit alpha isoform 2      |
| 256 | P61619 | Protein transport protein Sec61 subunit alpha isoform 1      |
| 257 | Q6VVX0 | Vitamin D 25-hydroxylase                                     |
| 258 | P61353 | 60S ribosomal protein L27                                    |
| 259 | P46781 | 40S ribosomal protein S9                                     |
| 260 | P06396 | Gelsolin                                                     |
| 261 | Q9Y3A5 | Ribosome maturation protein SBDS                             |
| 262 | Q6P4A8 | Phospholipase B-like 1                                       |

---

---

|     |        |                                             |
|-----|--------|---------------------------------------------|
| 263 | Q00341 | Vigilin                                     |
| 264 | Q9BVI4 | Nucleolar complex protein 4 homolog         |
| 265 | Q13148 | TAR DNA-binding protein 43                  |
| 266 | O75132 | Zinc finger BED domain-containing protein 4 |

---

## SUPPLEMENTARY FIGURE LEGENDS

### Supplementary Figure 1. Biological characteristics and clinical significance of BLACAT3.

**A and B.** Volcano plots showing lncRNAs with differential m6A modification levels (**A**) and expression levels (**B**) in 3 pairs of MIBC tissues and adjacent normal tissues.  $\text{Abs}(\log_2\text{FC}) > 0.585$  and  $P < 0.05$  were set as the thresholds. **C.** Diagram showed the chromosomal distribution of BLACAT3 in human BLCa tumor tissues and adjacent normal tissues. **D-G.** GO and KEGG analyses by ranking Pearson correlation coefficient between BLACAT3 and all mRNAs in m6A epitranscriptomic microarray matrix. Representative GSEA results related to cell division, protein binding, HIF-1 signaling and metabolism were shown. **H and I.** Evaluation of the protein-coding potential of BLACAT3 by Coding Potential Calculator 2 (CPC2, <http://cpc2.gao-lab.org/>). ACTB and GAPDH are recognized protein-coding genes. HOTAIR and BLACAT2 are widely confirmed lncRNAs. **J.** QRT-PCR was conducted to detect BLACAT3 expression in BLCa tumor tissues and adjacent normal tissues ( $n = 104$ ). **K.** Kaplan-Meier survival curves showed the effect of BLACAT3 expression on the DSS of BLCa patients (Log-rank (Mantel-Cox) test,  $P < 0.05$ ). Total of 104 BLCa patients were divided into high expression group and low expression group by the median value of relative BLACAT3 expression. **L.** Receiver operating characteristic curves demonstrated the prognostic accuracy of nomograms at 1, 2, 3, and 4 years. **M.** Calibration curves for OS of 1-year, 2-year, 3-year and 4-year verified the satisfied fitting degree of this model. Statistical significance was assessed using two-tailed Student's t test between two groups,  $****P < 0.0001$ . Abbreviations: MIBC, Muscle-invasive bladder cancer; GO, Gene Ontology; KEGG, Kyoto Encyclopedia of Genes and Genomes; GSEA, Gene Set Enrichment Analysis.

**Supplementary Figure 2. A.** QRT-PCR assay was performed to determine BLACAT3 expression in different BLCa cell lines (RT4, UM-UC-3, 5637, T24, J82 and SW780) and normal urothelial cell line (SV-HUC-1). **B.** Anti-m6A dot blot assay was performed to examine the overall m6A modification level of three BLCa cell lines (5637, UM-UC-3 and T24) and normal urothelial cell line (SV-HUC-1). **C.** QRT-PCR assay was used to verify the knockdown efficiency of three main RNA methyltransferases (METTL3, METTL14 and WTAP) and two typical RNA demethylases (ALKBH5 and FTO) in 5637 cells. **D.** MeRIP and qRT-PCR assay were

performed to detect BLACAT3 m6A modification proportion after knockdown of five m6A regulatory enzymes in 5637 cells. **E.** WB assay was conducted to investigate the protein level of ALKBH5 in different cell lines. Statistical significance was assessed using two-tailed Student's t test between two groups,  $*P < 0.05$ ,  $**P < 0.01$ ,  $***P < 0.001$ ,  $****P < 0.0001$ . Abbreviations: ns, no significance; qRT-PCR, Quantitative Real-Time Polymerase Chain Reaction; MeRIP, Methylated RNA Immunoprecipitation; WB, Western blots.

**Supplementary Figure 3. The effects of ALKBH5 on BLCa angiogenesis and migration in vitro.** **A-B.** CCK-8 assay was conducted to determine the regulatory effect of ALKBH5 on the proliferation of 5637 and T24 cells. **C-H.** HUVEC tube formation assay and transwell migration assay were performed to detect the effects of ALKBH5 knockdown (**C-E**) and overexpression (**F-H**) on the pro-angiogenic and migration of BLCa cells. Scale bars: 2 mm (black lines), 500  $\mu\text{m}$  (orange lines). Statistical significance was assessed using two-tailed Student's t test between two groups,  $*P < 0.05$ ,  $****P < 0.0001$ . Abbreviations: Cell Counting Kit-8.

**Supplementary Figure 4. Effects of BLACAT3 knockdown on proliferation of BLCa cells.** **A-B.** QRT-PCR assays were conducted to verify the knockdown efficiency of BLACAT3 in T24 and 5637 cells. **C and D.** NSG mice were sacrificed on research endpoint (day 35) after subcutaneous injection of stably BLACAT3 knockdown T24 cells, and the subcutaneous tumors were photographed and weighed. **E.** The subcutaneous tumor was fixed and embedded and then stained with H&E. Scale bars: 1.2mm (black lines), 30  $\mu\text{m}$  (orange lines). **F-H.** EdU assay was used to determine the effect of BLACAT3 knockdown on the proliferation of T24 and 5637 cells. Scale bars: 30  $\mu\text{m}$ . **I-K.** Plate cloning assay was performed to detect the effect of BLACAT3 knockdown on sphere formation in T24 and 5637 cells. Statistical significance was assessed using two-tailed Student's t test between two groups,  $*P < 0.05$ ,  $****P < 0.0001$ . Abbreviations: qRT-PCR, Quantitative Real-Time Polymerase Chain Reaction; NSG, NOD-SCID IL-2receptor Gamma null; H&E, Haematoxylin and Eosin; EdU, 5-Ethynyl-2'-deoxyuridine.

**Supplementary Figure 5. Effects of BLACAT3 overexpression on proliferation of BLCa cells.** **A-B.** QRT-PCR assay was used to verify the overexpression efficiency of BLACAT3 in



T24 and 5637 cells. **C-D.** NSG mice were sacrificed on the research endpoint (day 35) after subcutaneous injection of 5637 cells stably BLACAT3 overexpression, and the subcutaneous tumors were photographed and weighed. **E.** The subcutaneous tumor was fixed, embedded and then stained with H&E. Scale bars: 1.2mm (black lines), 30  $\mu$ m (orange lines). **F-H.** EdU assay was conducted to detect the effect of BLACAT3 overexpression on the proliferation of T24 and 5637 cells. Scale bars: 30  $\mu$ m. **I-K.** Plate cloning assay was performed to examine the effect of BLACAT3 overexpression on sphere formation in T24 and 5637 cells. Statistical significance was assessed using two-tailed Student's t test between two groups,  $*P < 0.05$ ,  $**P < 0.01$ ,  $***P < 0.0001$ . Abbreviations: qRT-PCR, Quantitative Real-Time Polymerase Chain Reaction; NSG, NOD-SCID IL-2receptor Gamma null; H&E, Haematoxylin and Eosin; EdU, 5-Ethynyl-2'-deoxyuridine.

**Supplementary Figure 6. Effects of BLACAT3 knockdown on the migration potential of BLCa cells. A-D.** Wound healing assay was used to detect the effect of BLACA3 knockdown on the migration of T24 and 5637 cells. Scale bars: 5 mm. Statistical significance was assessed using two-tailed Student's t test between two groups,  $***P < 0.0001$ .

**Supplementary Figure 7. Effects of BLACAT3 overexpression on angiogenesis and migration of BLCa cells in vitro. A-H.** HUVEC tube formation assay, transwell migration assay and wound healing assay were performed to examine the effect of BLACAT3 overexpression on the angiogenesis and migration of T24 (**A-D**) and 5637 (**E-H**) cells. Scale bars: 2 mm (black lines), 500  $\mu$ m (red lines), 5 mm (orange lines). Statistical significance was assessed using two-tailed Student's t test between two groups,  $***P < 0.001$ ,  $****P < 0.0001$ . Abbreviations: HUVEC, Human Umbilical Vein Endothelial Cell.

**Supplementary Figure 8. Effects of BLACAT3 overexpression on BLCa cell hematogenous metastasis in vivo. A and B.** In vivo imaging was performed on day 28 after tail vein injection of 5637 cells with stable BLACAT3 overexpression into NSG mice, and fluorescence quantitative statistics were performed on representative images. **C and D.** NSG mice were sacrificed on the 28th day after tail vein injection model was constructed, and gross

samples of kidney and lung were isolated, fixed, embedded and sliced for H&E staining. Scale bars: 1.2 mm (black lines), 30  $\mu$ m (orange lines). Statistical significance was assessed using two-tailed Student's t test between two groups, \*\*\*\* $P < 0.0001$ . Abbreviations: NSG, NOD-SCID IL-2receptor Gamma null; H&E, Haematoxylin and Eosin.

**Supplementary Figure 9. RNA-sequencing analysis.** **A.** Volcano plot showed the proportion of differentially expressed genes after BLACAT3 knockdown. **B.** GO analysis of biological functions enriched by differentially expressed genes after BLACAT3 knockdown. **C.** QRT-PCR assay was performed to detect NCF2 expression in clinical BLCa tumor tissues and adjacent normal tissues (n = 104). **D.** WikiPathways analysis of signaling pathways enriched based on differentially expressed genes after BLACAT3 knockdown. Statistical significance was assessed using two-tailed Student's t test between two groups, \*\*\*\* $P < 0.0001$ . Abbreviations: GO, Gene Ontology; qRT-PCR, Quantitative Real-Time Polymerase Chain Reaction.

**Supplementary Figure 10. YBX3 identification by MS and functional enrichment analysis.** **A and B.** GO analysis of biological functions enriched by BLACAT3-binding proteins identified by MS. **C.** KEGG and WikiPathways analysis of signaling pathways enriched by BLACAT3-binding proteins. **D.** The top 15 RNA Binding proteins pulled down by BLACAT3. **E.** Differential expression profile of mRNAs between 411 BLCa tumor tissues and 19 normal bladder tissues in the TCGA-BLCa dataset showed that YBX3 was not differentially expressed. **F.** The relationship between the mRNA level of YBX3 and BLCa patient OS was analyzed based on the TCGA data ( $P > 0.05$ ). Abbreviations: ns, no significance; GO, Gene Ontology; KEGG, Kyoto Encyclopedia of Genes and Genomes; TCGA, The Cancer Genome Atlas; OS, Overall Survival.

**Supplementary Figure 11. YBX3 binds to NCF2 promoter and regulate transcription.** **A.** ChIP-sequencing data (<https://www.encodeproject.org/>) in K562 cells showed the sequence site of YBX3 binding to NCF2. **B.** QRT-PCR assay was performed to verify the knockdown efficiency of YBX3, and detected the effect of YBX3 knockdown on NCF2 mRNA expression in T24 cells. **C.** QRT-PCR assays were performed to verify the overexpression efficiency of YBX3,

and detect the effect of YBX3 overexpression on NCF2 mRNA expression in T24 cells. **D-F.** WB verified the knockdown efficiency of YBX3 in T24 and 5637 cell lines. Statistical significance was assessed using two-tailed Student's t test between two groups,  $*P < 0.05$ ,  $**P < 0.01$ ,  $****P < 0.0001$ . Abbreviations: ChIP, Chromatin immunoprecipitation; qRT-PCR, Quantitative Real-Time Polymerase Chain Reaction.

**Supplementary Figure 12. Statistical histogram of WB bands.** Statistical significance was assessed using two-tailed Student's t test between two groups.  $*P < 0.05$ ,  $**P < 0.01$ ,  $***P < 0.001$ . Abbreviation: ns, no significance.

**Supplementary Figure 13. BLACAT3 promotes BLCa proliferation and metastasis via activating NF- $\kappa$ B signaling pathway. A.** IHC assay was conducted to investigate the effect of BLACAT3 on NF- $\kappa$ B signaling pathway in subcutaneous xenograft model. **B.** IHC assay was conducted to investigate the effect of BLACAT3 on NF- $\kappa$ B signaling pathway in hematogenous metastasis model. Abbreviation: IHC, immunohistochemistry.

**Supplementary Figure 14. BLACAT3/NCF2 axis can activate NF- $\kappa$ B signaling pathway. A.** WB assay was conducted to investigate the effect of BLACAT3/NCF2 axis on NF- $\kappa$ B signaling pathway. **B.** Statistical histogram of WB bands. Statistical significance was assessed using two-tailed Student's t test between two groups.  $*P < 0.05$ ,  $**P < 0.01$ ,  $***P < 0.001$ . Abbreviation: ns, no significance.

**Supplementary Figure 15. Mechanism diagram by which BLACAT3 promotes BLCa tumor angiogenesis and metastasis.** M6A modification contributes to BLACAT3 upregulation by stabilizing RNA structure. BLACAT3 induces YBX3 to shuttle into the nucleus, synergistically enhances NCF2 transcription, and promotes BLCa angiogenesis and metastasis via activating NF- $\kappa$ B signaling pathway.

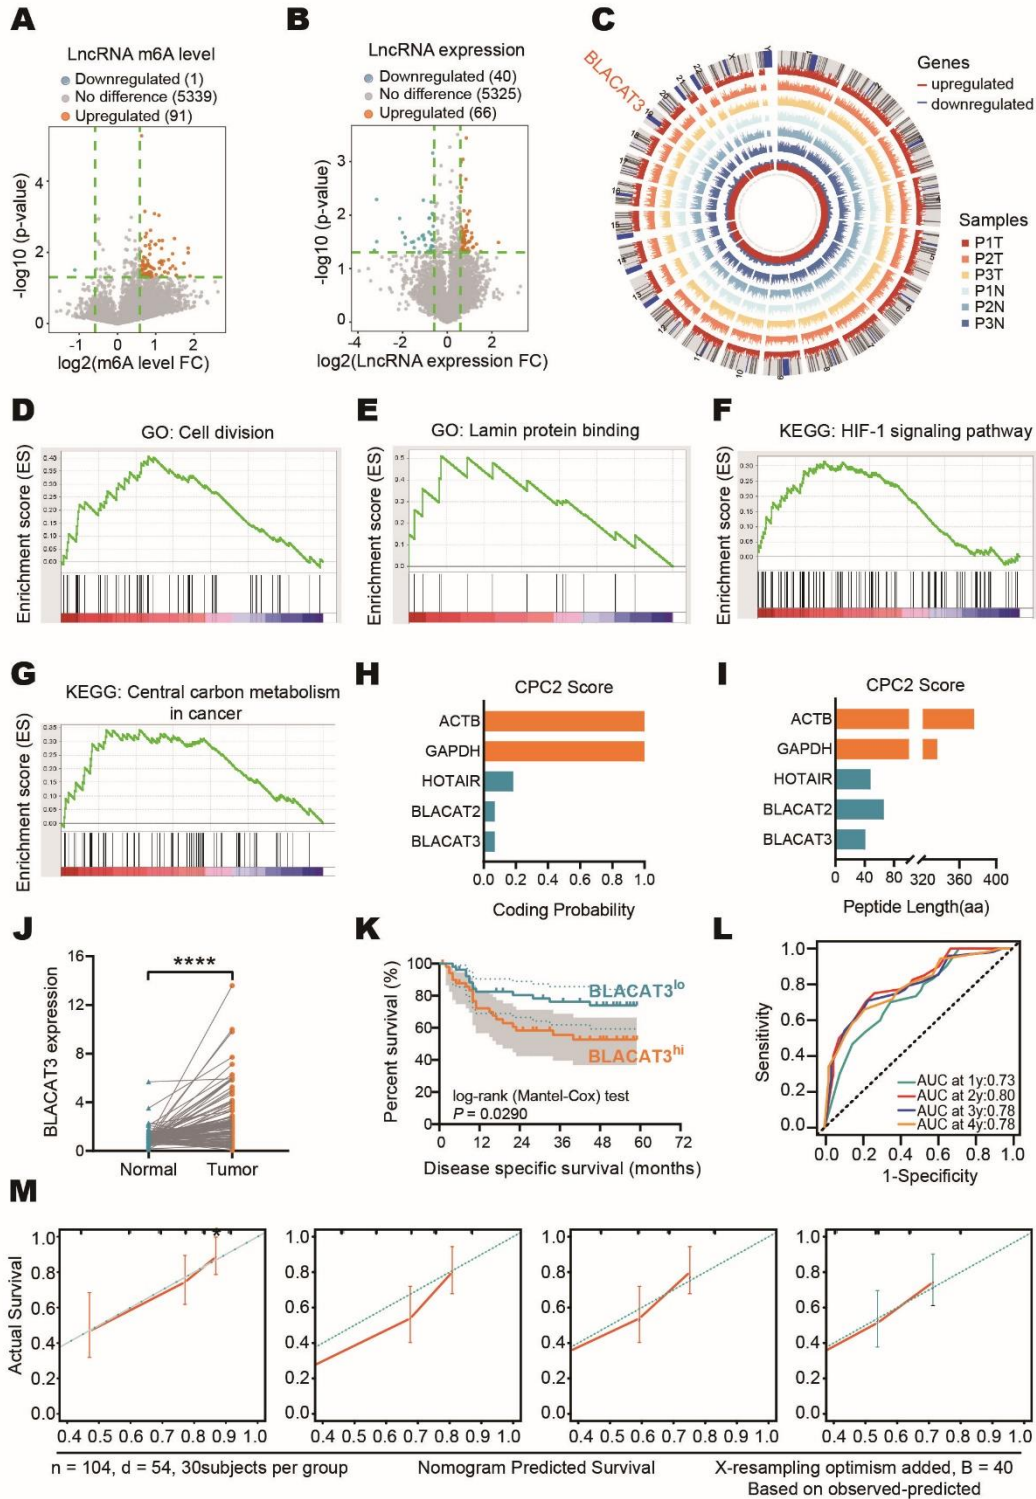

**Supplementary Figure 1. Biological characteristics and clinical significance of BLACAT3.** **A** and **B**. Volcano plots showing lncRNAs with differential m6A modification levels (**A**) and expression levels (**B**) in 3 pairs of MIBC tissues and adjacent normal tissues.  $\text{Abs}(\log_2\text{FC}) > 0.585$  and  $P < 0.05$  were set as the thresholds. **C**. Diagram showed the chromosomal distribution of BLACAT3 in human BLCa tumor tissues and adjacent normal tissues. **D-G**. GO and KEGG analyses by ranking pearson correlation coefficient between BLACAT3 and all mRNAs in m6A epitranscriptomic microarray matrix. Representative GSEA results related to cell division, protein binding, HIF-1 signaling and metabolism were shown. **H** and **I**. Evaluation of the protein-coding potential of BLACAT3 by Coding Potential Calculator 2 (CPC2, <http://cpc2.gao-lab.org/>). ACTB and GAPDH are recognized protein-coding genes. HOTAIR and BLACAT2 are widely confirmed lncRNAs. **J**. QRT-PCR was conducted to detect BLACAT3 expression in BLCa tumor tissues and adjacent normal tissues ( $n = 104$ ). **K**. Kaplan-Meier survival curves showed the effect of BLACAT3 expression on the DSS of BLCa patients (Log-rank (Mantel-Cox) test,  $P < 0.05$ ). Total of 104 BLCa patients were divided into high expression group and low expression group by the median value of relative BLACAT3 expression. **L**. Receiver operating characteristic curves demonstrated the prognostic accuracy of nomograms at 1, 2, 3, and 4 years. **M**. Calibration curves for OS of 1-year, 2-year, 3-year and 4-year verified the satisfied fitting degree of this model. Statistical significance was assessed using two-tailed Student's t test between two groups,  $****P < 0.0001$ . Abbreviations: MIBC, Muscle-invasive bladder cancer; GO, Gene Ontology; KEGG, Kyoto Encyclopedia of Genes and Genomes; GSEA, Gene Set Enrichment Analysis.

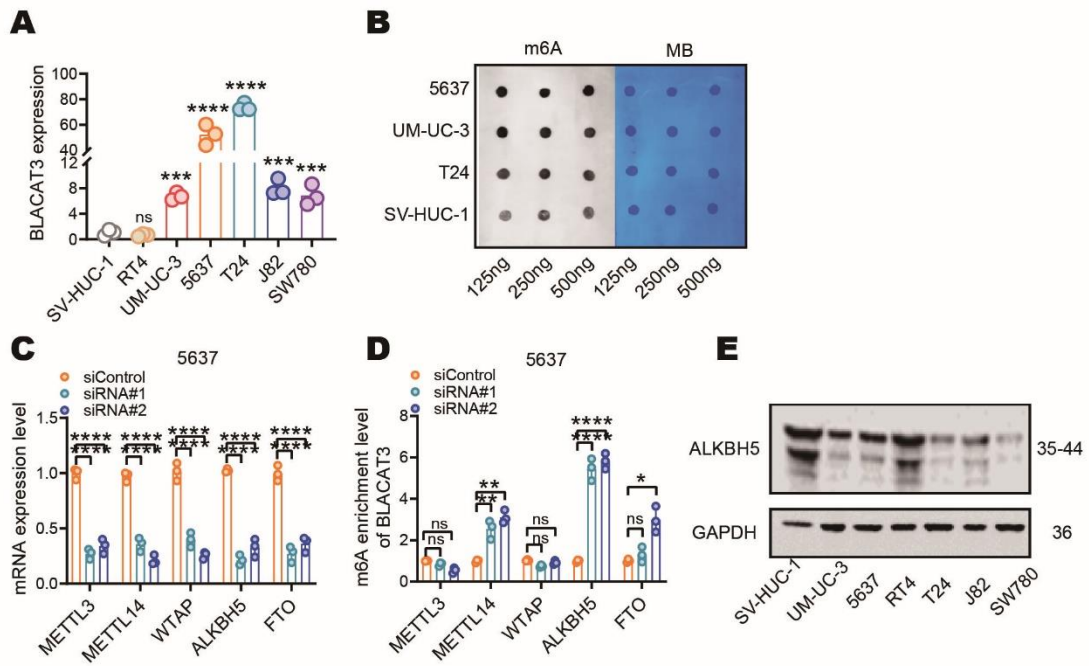

**Supplementary Figure 2.** A. QRT-PCR assay was performed to determine BLACAT3 expression in different BLCa cell lines (RT4, UM-UC-3, 5637, T24, J82 and SW780) and normal urothelial cell line (SV-HUC-1). B. Anti-m6A dot blot assay was performed to detect the overall m6A modification level of three BLCa cell lines (5637, UM-UC-3 and T24) and normal urothelial cell line (SV-HUC-1). C. QRT-PCR assay was used to verify the knockdown efficiency of three main RNA methyltransferases (METTL3, METTL14 and WTAP) and two typical RNA demethylases (ALKBH5 and FTO) in 5637 cells. D. MeRIP and qRT-PCR assay were performed to detect BLACAT3 m6A modification proportion after knockdown of five m6A regulatory enzymes in 5637 cells. E. WB assay was conducted to investigate the protein level of ALKBH5 in different cell lines. Statistical significance was assessed using two-tailed Student's t test between two groups, \* $P < 0.05$ , \*\* $P < 0.01$ , \*\*\* $P < 0.001$ , \*\*\*\* $P < 0.0001$ . Abbreviations: ns, no significance; qRT-PCR, Quantitative Real-Time Polymerase Chain Reaction; MeRIP, Methylated RNA Immunoprecipitation; WB, Western blots.

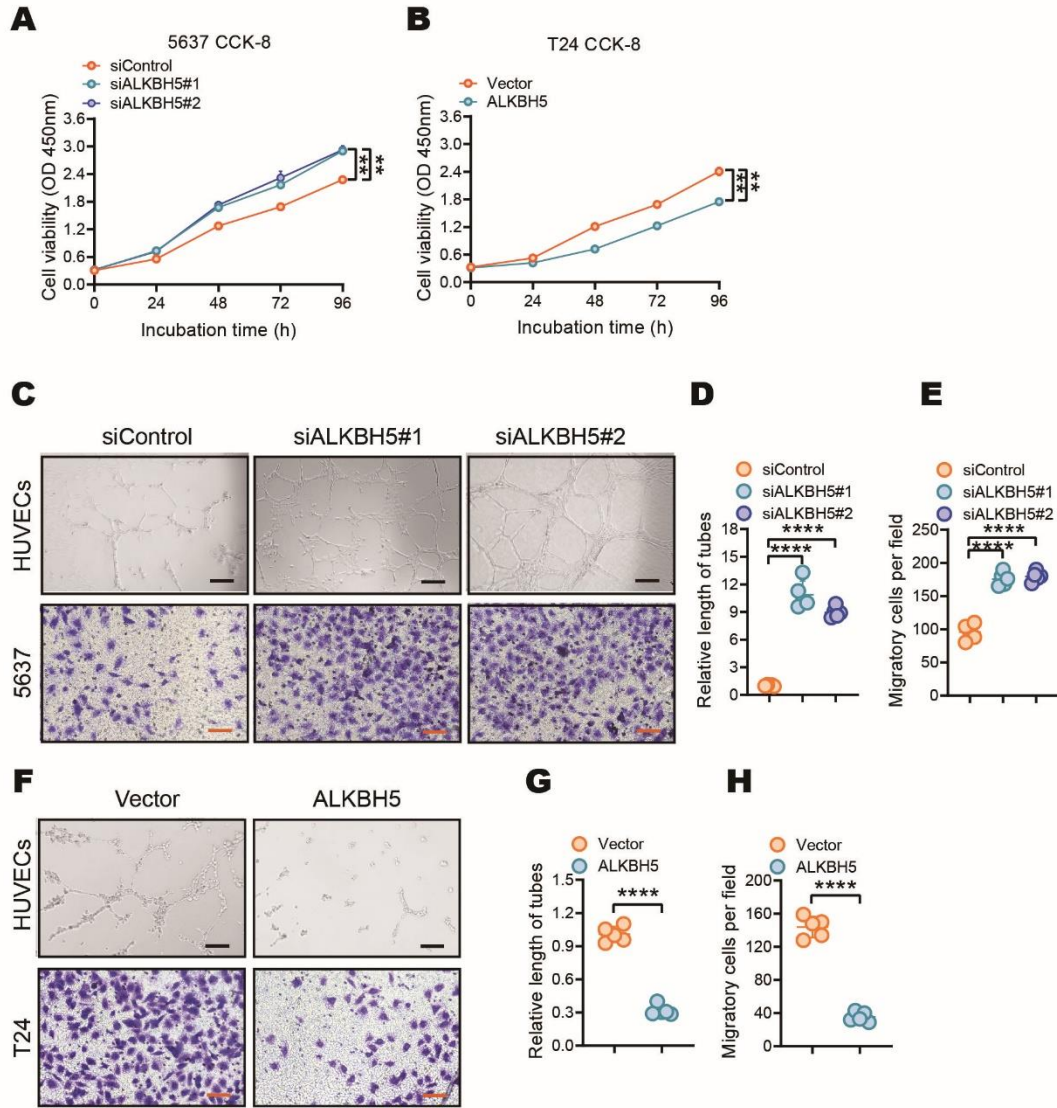

**Supplementary Figure 3. The effects of ALKBH5 on BLCa angiogenesis and migration in vitro.** A-B. CCK-8 assay was conducted to determine the regulatory effect of ALKBH5 on the proliferation of 5637 and T24 cells. C-H HUVEC tube formation assay and transwell migration assay were performed to detect the effects of ALKBH5 knockdown (C-E) and overexpression (F-H) on the pro-angiogenic and migration of BLCa cells. Scale bars: 2mm (black lines), 500µm (orange lines). Statistical significance was assessed using two-tailed Student's t test between two groups, \*\* $P < 0.01$ , \*\*\*\* $P < 0.0001$ . Abbreviations: CCK-8, Cell Counting Kit-8.

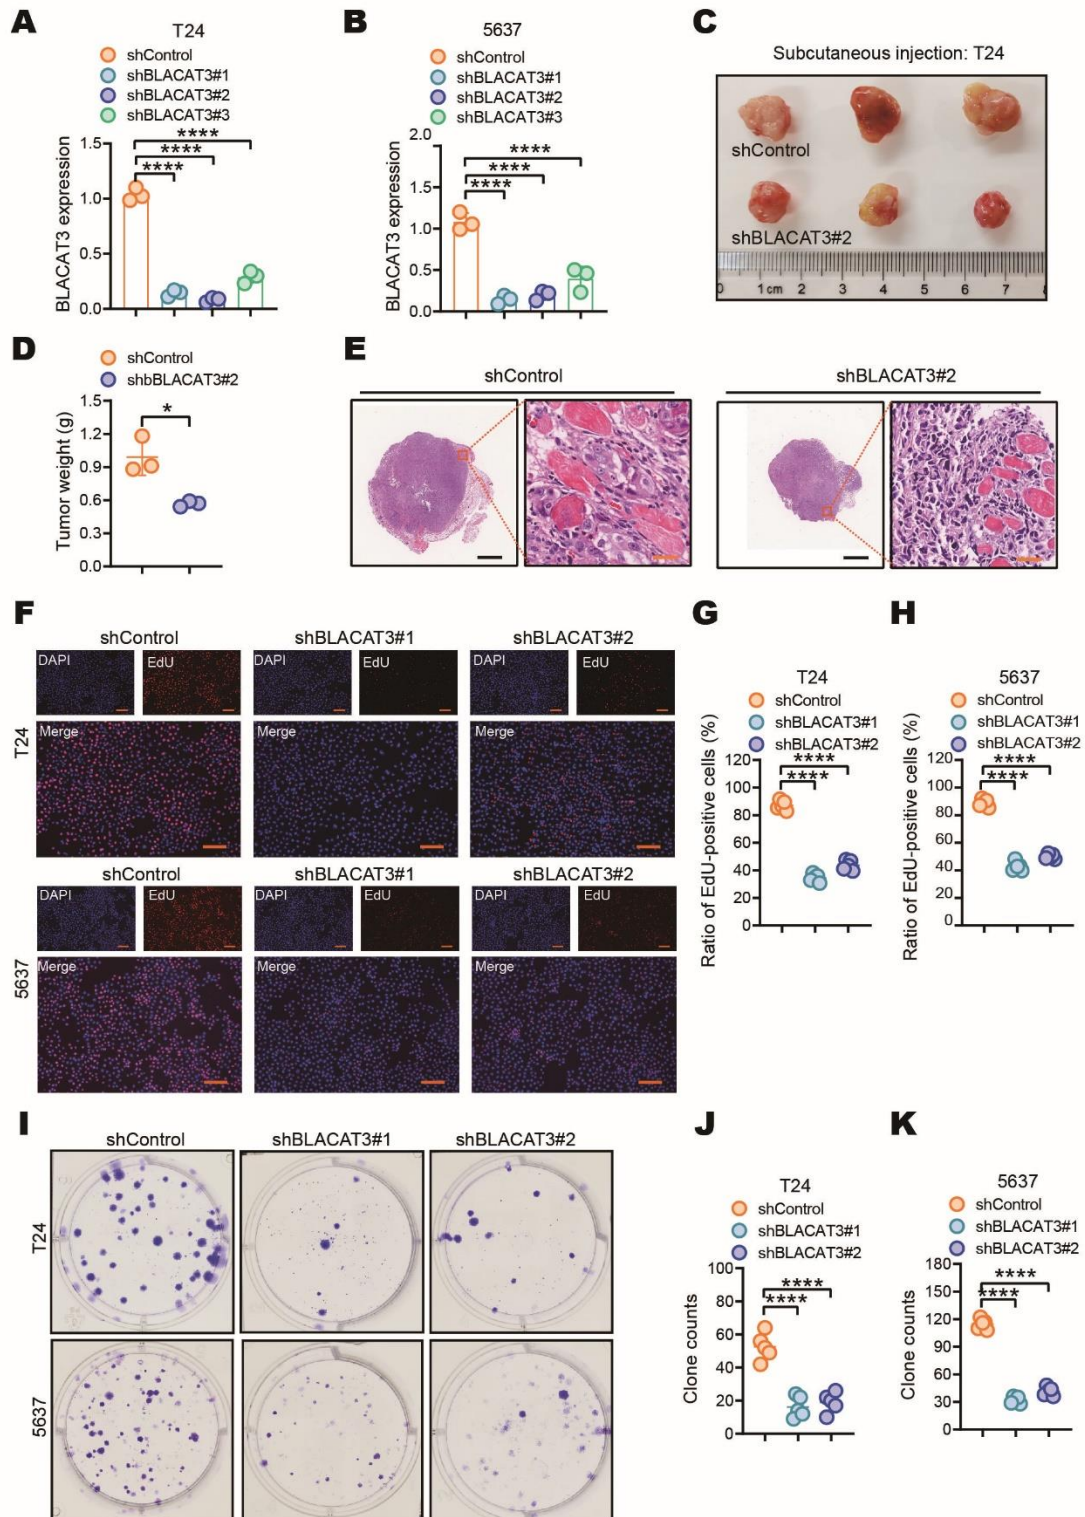

**Supplementary Figure 4. Effects of BLACAT3 knockdown on proliferation of BLCa cells.** A-B. QRT-PCR assays were conducted to verify the knockdown efficiency of BLACAT3 in T24 and 5637 cells. C and D. NSG mice were sacrificed on research endpoint (day 35) after subcutaneous injection of stably BLACAT3 knockdown T24 cells, and the subcutaneous tumors were photographed and weighed. E. The subcutaneous tumor was fixed and embedded and then stained with H&E. Scale bars: 1.2mm (black lines), 30 μm (orange lines). F-H. EdU assay was used to determine the effect of BLACAT3 knockdown on the proliferation of T24 and 5637 cells. Scale bars: 30 μm. I-K. Plate cloning assay was performed to detect the effect of BLACAT3 knockdown on sphere formation in T24 and 5637 cells. Statistical significance was assessed using two-tailed Student's t test between two groups, \* $P < 0.05$ , \*\*\*\* $P < 0.0001$ . Abbreviations: qRT-PCR, Quantitative Real-Time Polymerase Chain Reaction; NSG, NOD-SCID IL-2receptor Gamma null; H&E, Haematoxylin and Eosin; EdU, 5-Ethynyl-2'-deoxyuridine.

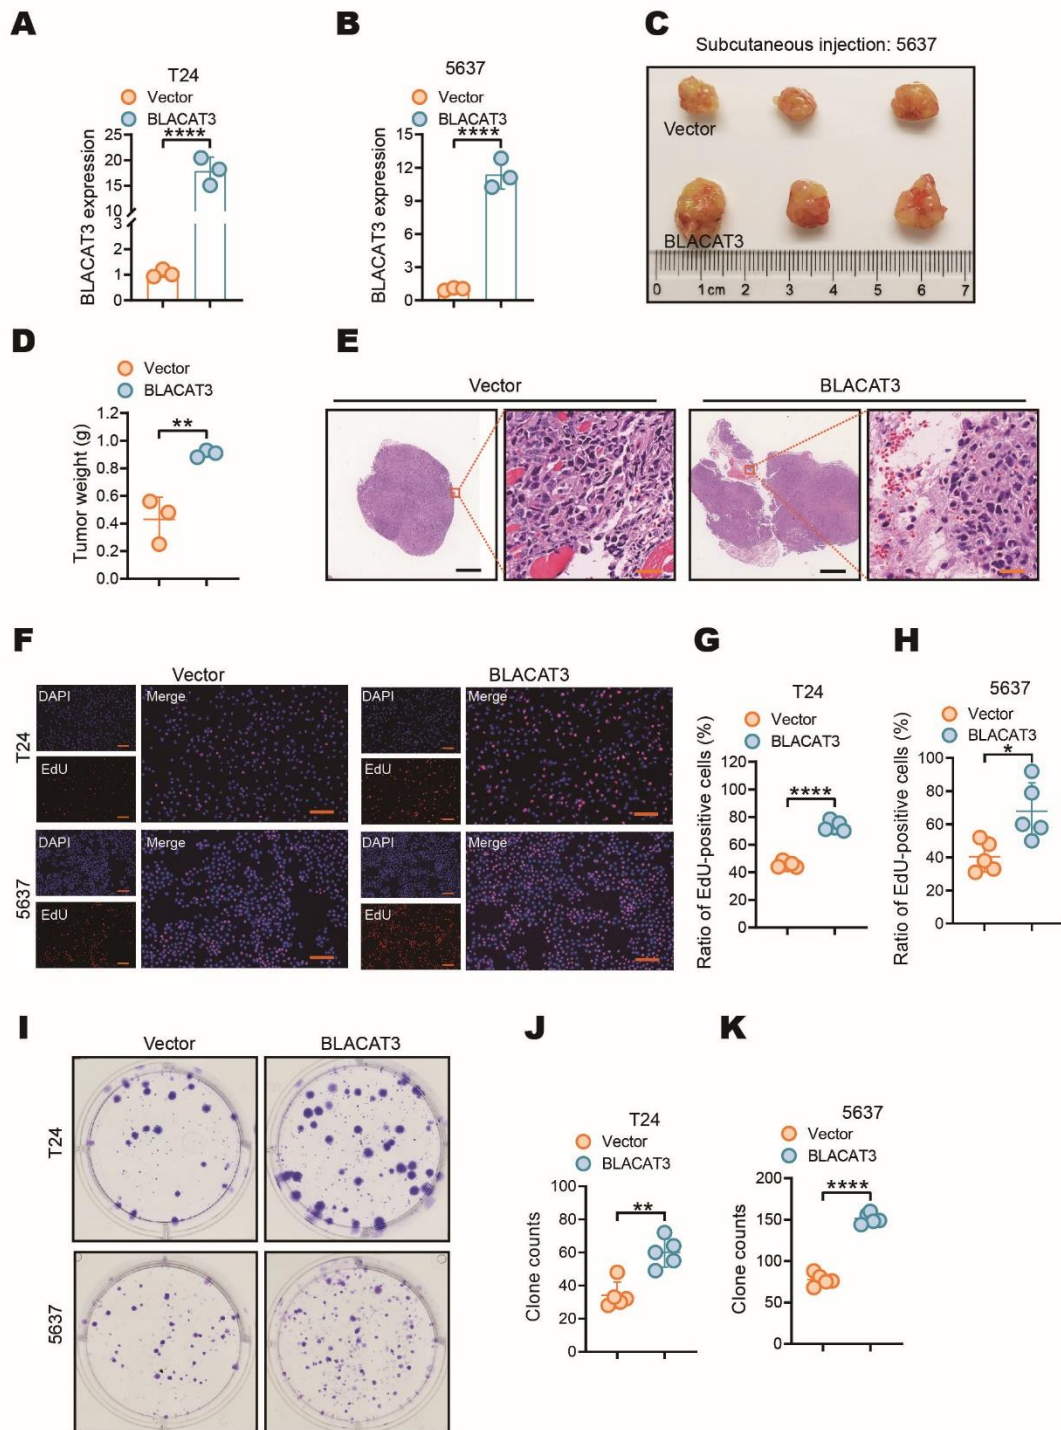

**Supplementary Figure 5. Effects of BLACAT3 overexpression on proliferation of BLCa cells.** A-B. QRT-PCR assay was used to verify the overexpression efficiency of BLACAT3 in T24 and 5637 cells. C-D. NSG mice were sacrificed on the research endpoint (day 35) after subcutaneous injection of 5637 cells stably BLACAT3 overexpression, and the subcutaneous tumors were photographed and weighed. E. The subcutaneous tumor was fixed, embedded and then stained with H&E. Scale bars: 1.2mm (black lines), 30 μm (orange lines). F-H. EdU assay was conducted to detect the effect of BLACAT3 overexpression on the proliferation of T24 and 5637 cells. Scale bars: 30 μm. I-K. Plate cloning assay was performed to examine the effect of BLACAT3 overexpression on sphere formation in T24 and 5637 cells. Statistical significance was assessed using two-tailed Student's t test between two groups, \* $P < 0.05$ , \*\* $P < 0.01$ , \*\*\*\* $P < 0.0001$ . Abbreviations: qRT-PCR, Quantitative Real-Time Polymerase Chain Reaction; NSG, NOD-SCID IL-2receptor Gamma null; H&E, Haematoxylin and Eosin; EdU, 5-Ethynyl-2'-deoxyuridine.



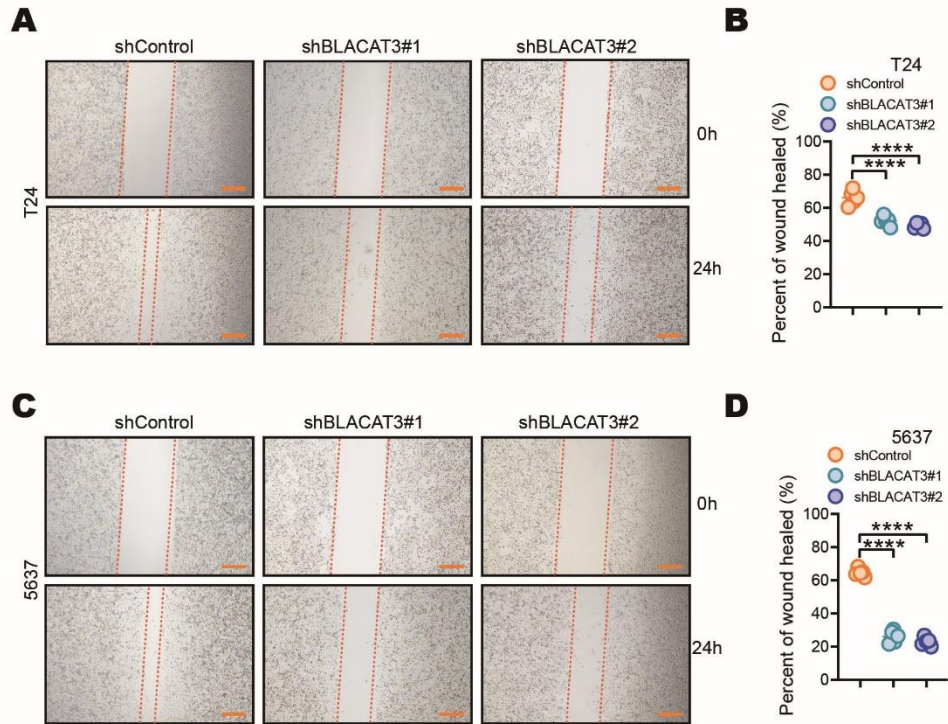

**Supplementary Figure 6. Effects of BLACAT3 knockdown on the migration ability of BLCa cells. A-D.** Wound healing assay was used to detect the effect of BLACAT3 knockdown on the migration of T24 and 5637 cells. Scale bars: 5 mm. Statistical significance was assessed using two-tailed Student's t test between two groups, \*\*\*\* $P < 0.0001$ .

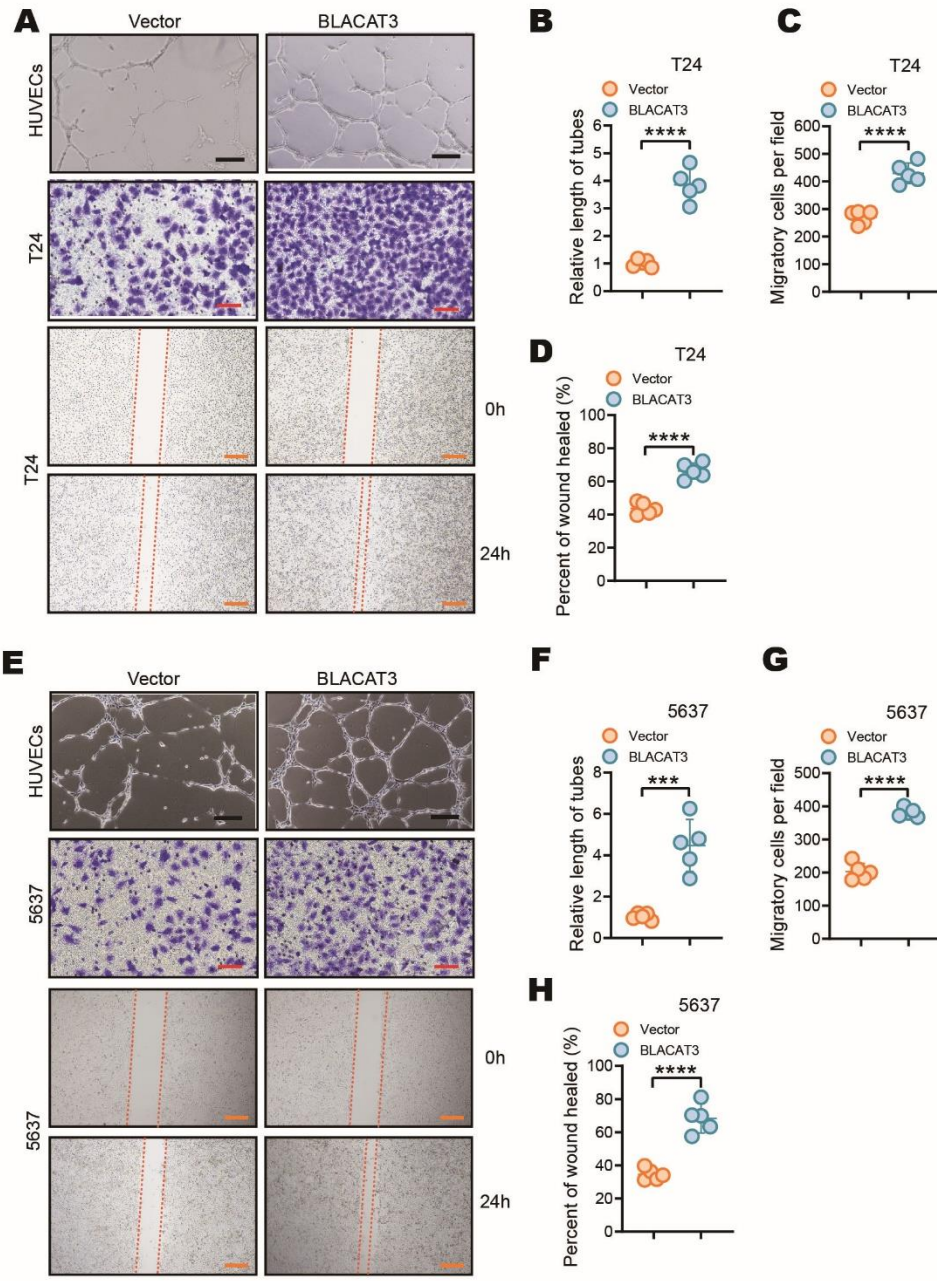

**Supplementary Figure 7. Effects of BLACAT3 overexpression on angiogenesis and migration of BLCa cells in vitro. A-H.** HUVEC tube formation assay, transwell migration assay and wound healing assay were performed to examine the effect of BLACAT3 overexpression on the angiogenesis and migration of T24 (A-D) and 5637 (E-H) cells. Scale bars: 2 mm (black lines), 500  $\mu$ m (red lines), 5 mm (orange lines). Statistical significance was assessed using two-tailed Student's t test between two groups, \*\*\* $P$  < 0.001, \*\*\*\* $P$  < 0.0001. Abbreviations: HUVEC, Human Umbilical Vein Endothelial Cell.

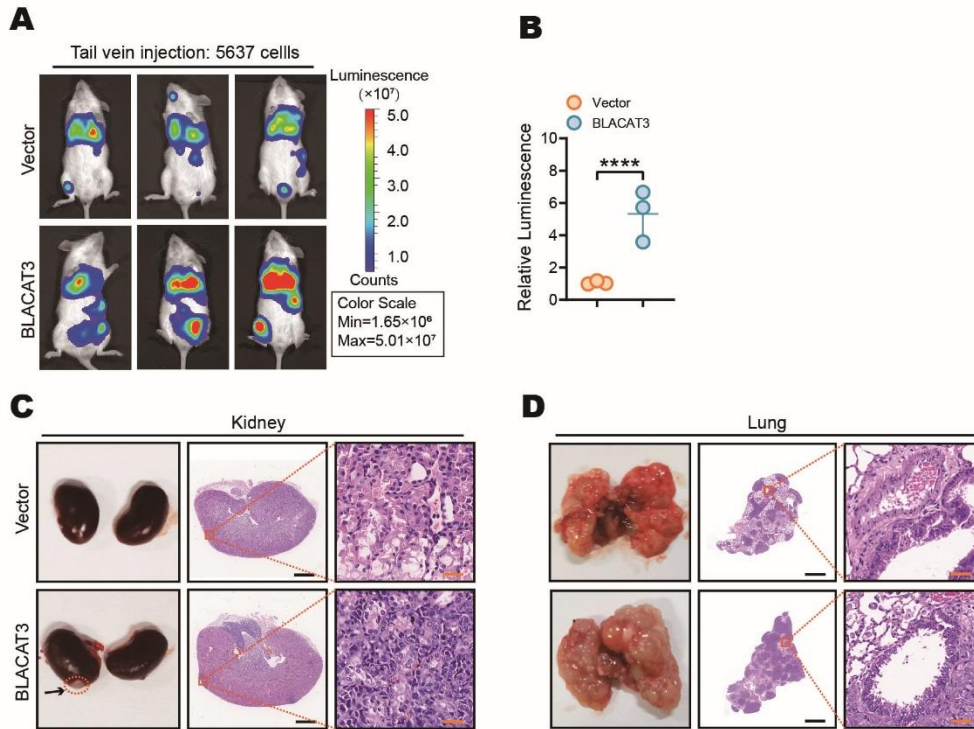

**Supplementary Figure 8. Effects of BLACAT3 overexpression on BLCa cell hematogenous metastasis in vivo. A and B.** In vivo imaging was performed on day 28 after tail vein injection of 5637 cells with stable BLACAT3 overexpression into NSG mice, and fluorescence quantitative statistics were performed on representative images. **C and D.** NSG mice were sacrificed on the 28th day after tail vein injection model was constructed, and gross samples of kidney and lung were isolated, fixed, embedded and sliced for H&E staining. Scale bars: 1.2 mm (black lines), 30  $\mu$ m (orange lines). Statistical significance was assessed using two-tailed Student's t test between two groups, \*\*\*\* $P < 0.0001$ . Abbreviations: NSG, NOD-SCID IL-2receptor Gamma null; H&E, Haematoxylin and Eosin.

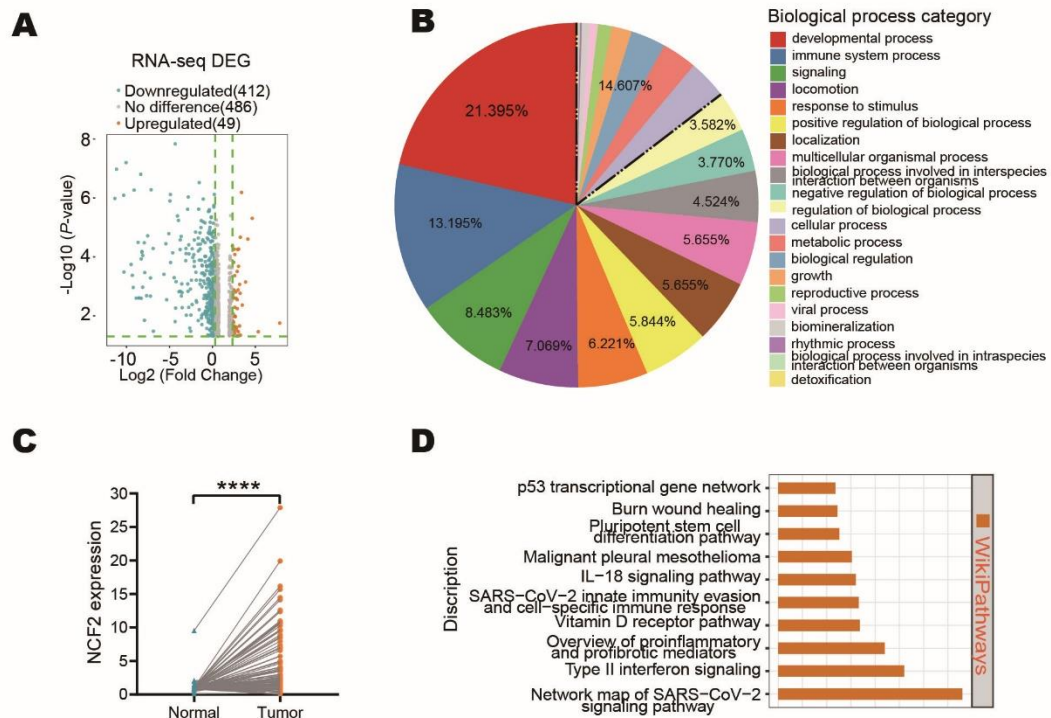

**Supplementary Figure 9. RNA-sequencing analysis.** A. Volcano plot showed the proportion of differentially expressed genes after BLACAT3 knockdown. B. GO analysis of biological functions enriched by differentially expressed genes after BLACAT3 knockdown. C. qRT-PCR assay was performed to detect NCF2 expression in clinical BLCa tumor tissues and adjacent normal tissues (n = 104). D. WikiPathways analysis of signaling pathways enriched based on differentially expressed genes after BLACAT3 knockdown. Statistical significance was assessed using two-tailed Student's t test between two groups, \*\*\*\* $P < 0.0001$ . Abbreviations: GO, Gene Ontology; qRT-PCR, Quantitative Real-Time Polymerase Chain Reaction.

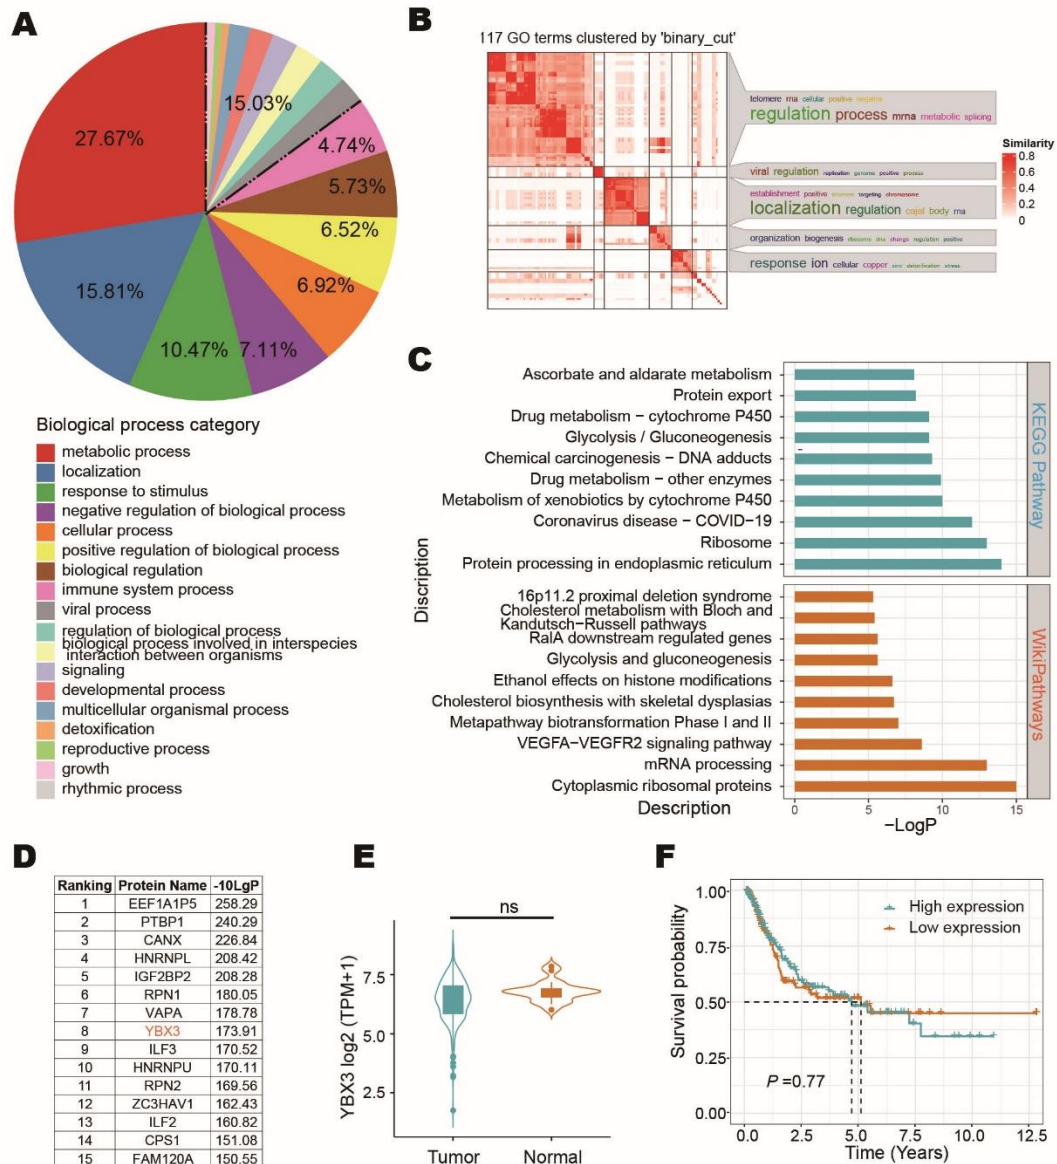

**Supplementary Figure 10. YBX3 identification by MS and functional enrichment analysis. A and B.** GO analysis of biological functions enriched by BLACAT3-binding proteins identified by MS. **C.** KEGG and WikiPathways analysis of signaling pathways enriched by BLACAT3-binding proteins. **D.** The top 15 RNA Binding proteins pulled down by BLACAT3. **E.** Differential expression profile of mRNAs between 411 BLCa tumor tissues and 19 normal bladder tissues in the TCGA-BLCa dataset showed that YBX3 was not differentially expressed. **F.** The relationship between the mRNA level of YBX3 and BLCa patient OS was analyzed based on the TCGA data ( $P > 0.05$ ). Abbreviations: ns, no significance; GO, Gene Ontology; KEGG, Kyoto Encyclopedia of Genes and Genomes; TCGA, The Cancer Genome Atlas; OS, Overall Survival.

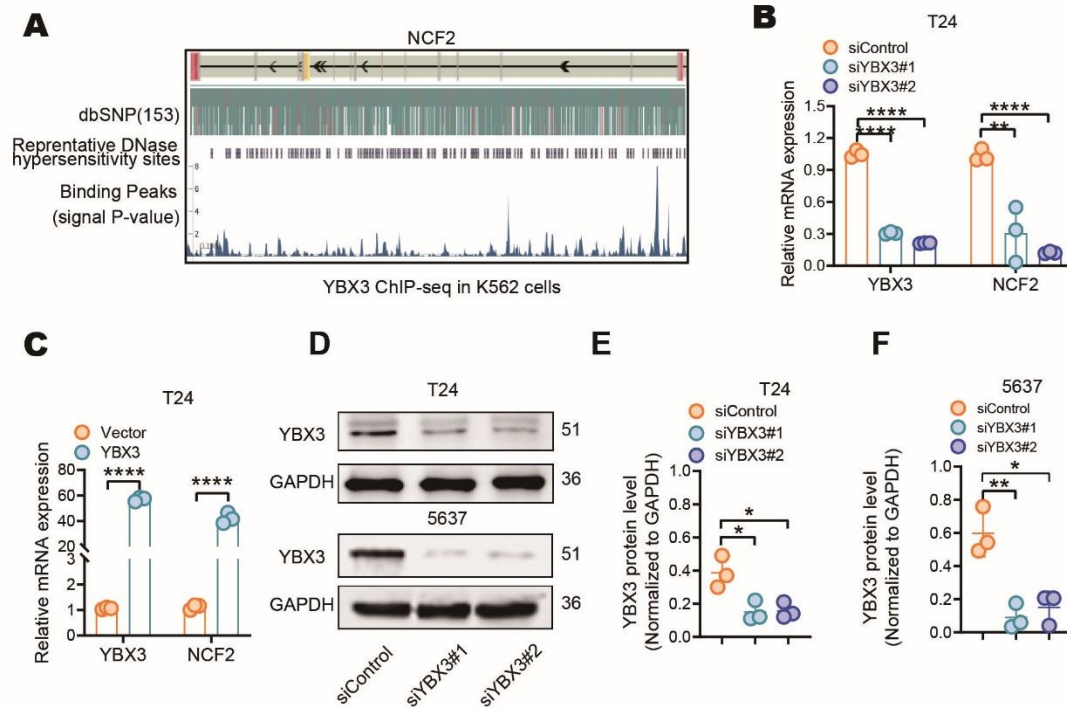

**Supplementary Figure 11. YBX3 binds to NCF2 promoter and regulate transcription.** **A.** ChIP-sequencing data (<https://www.encodeproject.org/>) in K562 cells showed the sequence site of YBX3 binding to NCF2. **B.** QRT-PCR assay was performed to verify the knockdown efficiency of YBX3, and detected the effect of YBX3 knockdown on NCF2 mRNA expression in T24 cells. **C.** QRT-PCR assays were performed to verify the overexpression efficiency of YBX3, and detect the effect of YBX3 overexpression on NCF2 mRNA expression in T24 cells. **D-F.** WB verified the knockdown efficiency of YBX3 in T24 and 5637 cell lines. Statistical significance was assessed using two-tailed Student's t test between two groups, \* $P < 0.05$ , \*\* $P < 0.01$ , \*\*\*\* $P < 0.0001$ . Abbreviations: ChIP, Chromatin immunoprecipitation; qRT-PCR, Quantitative Real-Time Polymerase Chain Reaction.

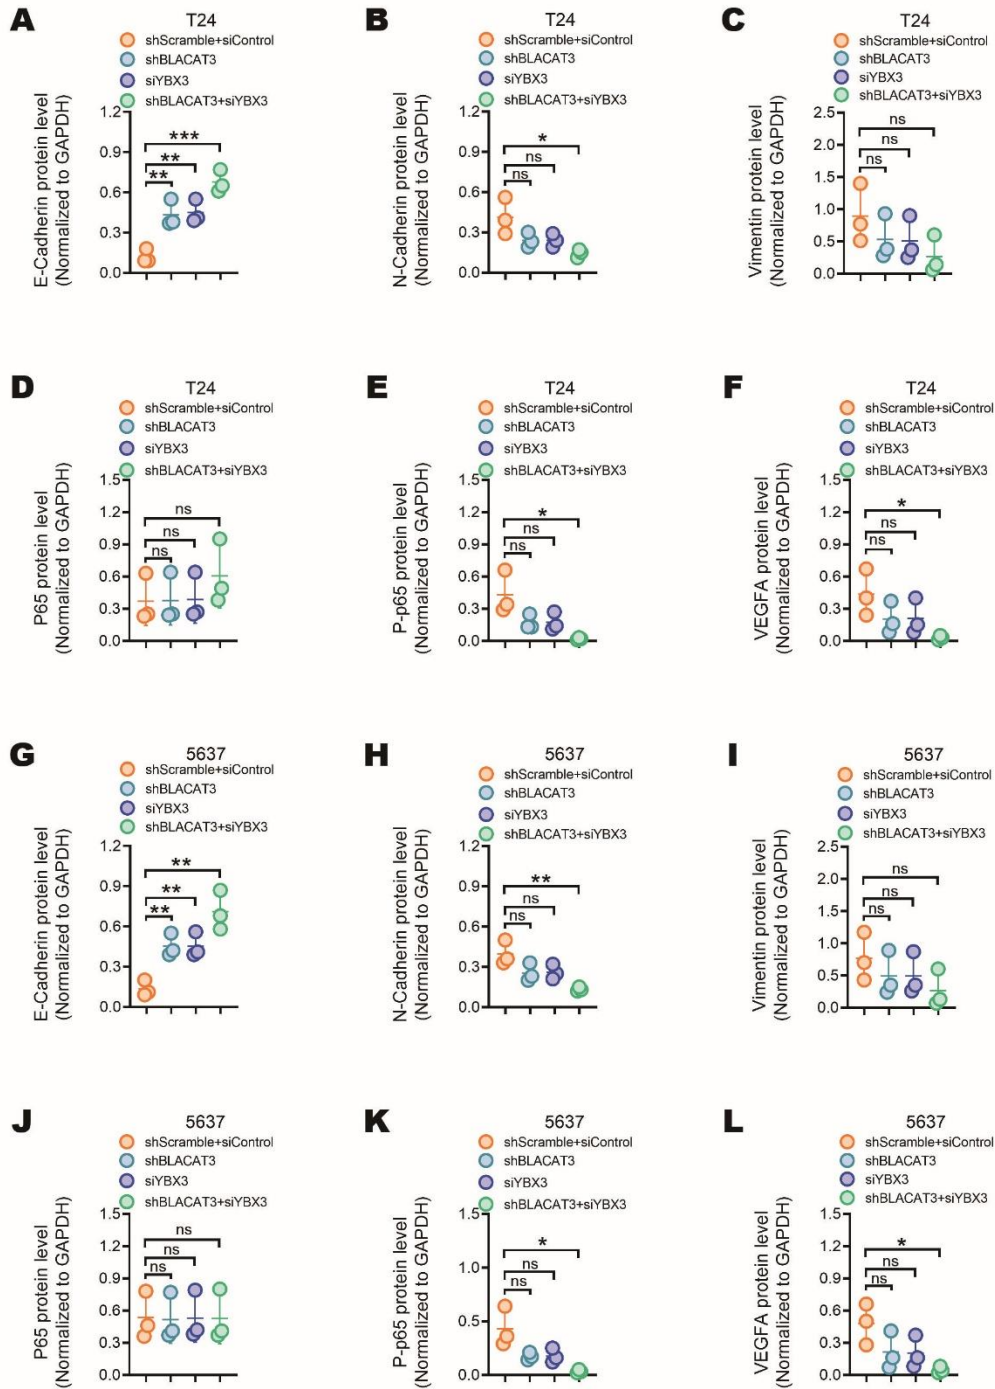

**Supplementary Figure 12. Statistical histogram of WB bands.** Statistical significance was assessed using two-tailed Student's t test between two groups. \* $P < 0.05$ , \*\* $P < 0.01$ , \*\*\* $P < 0.001$ . Abbreviation: ns, no significance.

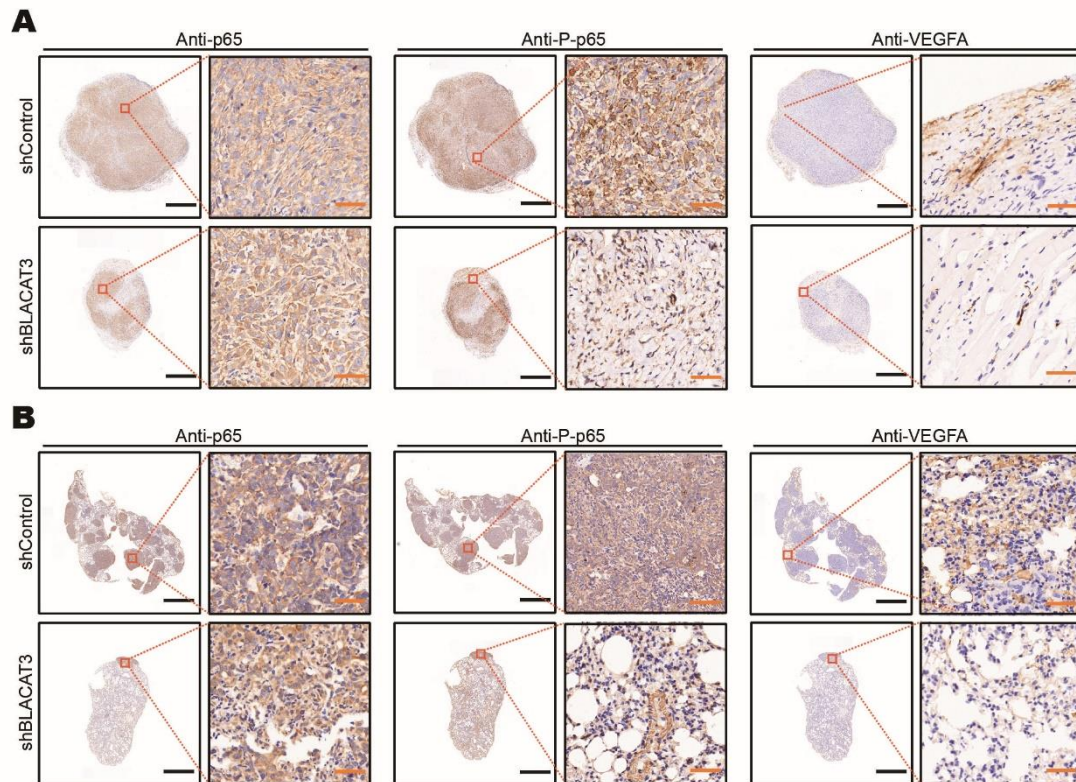

**Supplementary Figure 13. BLACAT3 promotes BLCa proliferation and metastasis via activating NF- $\kappa$ B signaling pathway. A.** IHC assay was conducted to investigate the effect of BLACAT3 on NF- $\kappa$ B signaling pathway in subcutaneous xenograft model. **B.** IHC assay was conducted to investigate the effect of BLACAT3 on NF- $\kappa$ B signaling pathway in hematogenous metastasis model. Abbreviation: IHC, immunohistochemistry.



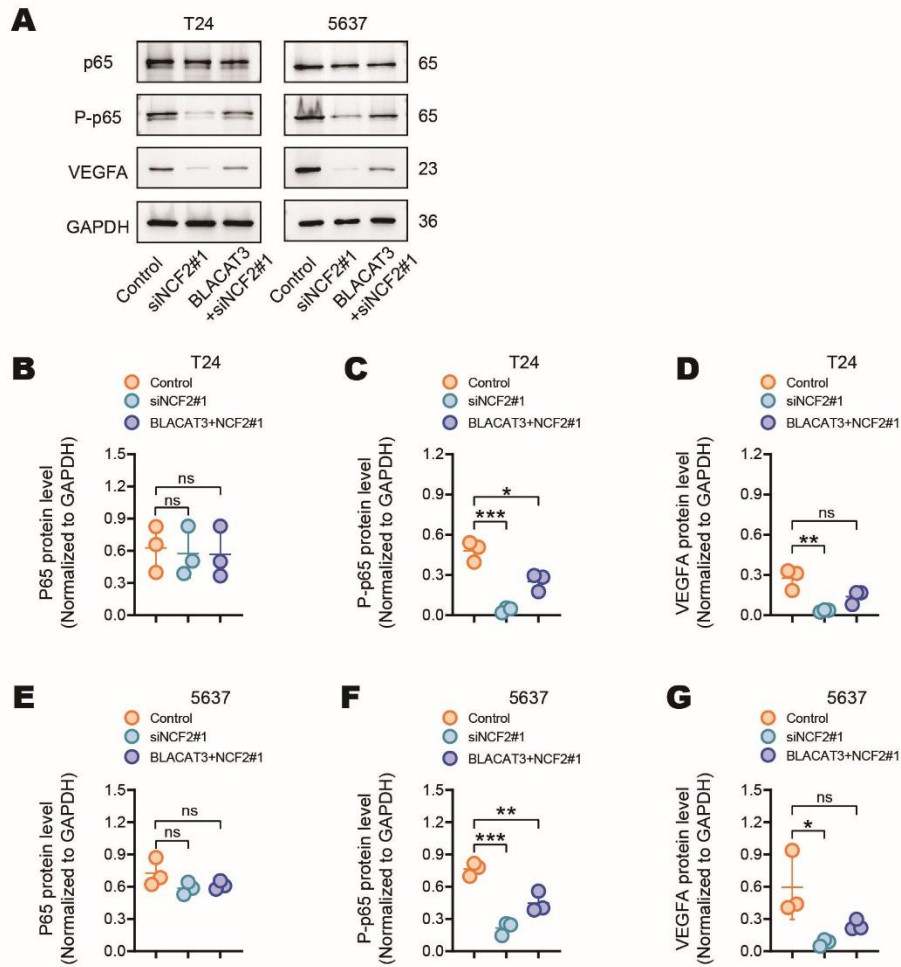

**Supplementary Figure 14. BLACAT3/NCF2 axis can activate NF- $\kappa$ B signaling pathway.** A. WB assay was conducted to investigate the effect of BLACAT3/NCF2 axis on NF- $\kappa$ B signaling pathway. B. Statistical histogram of WB bands. Statistical significance was assessed using two-tailed Student's t test between two groups. \* $P < 0.05$ , \*\* $P < 0.01$ , \*\*\* $P < 0.001$ . Abbreviation: ns, no significance.

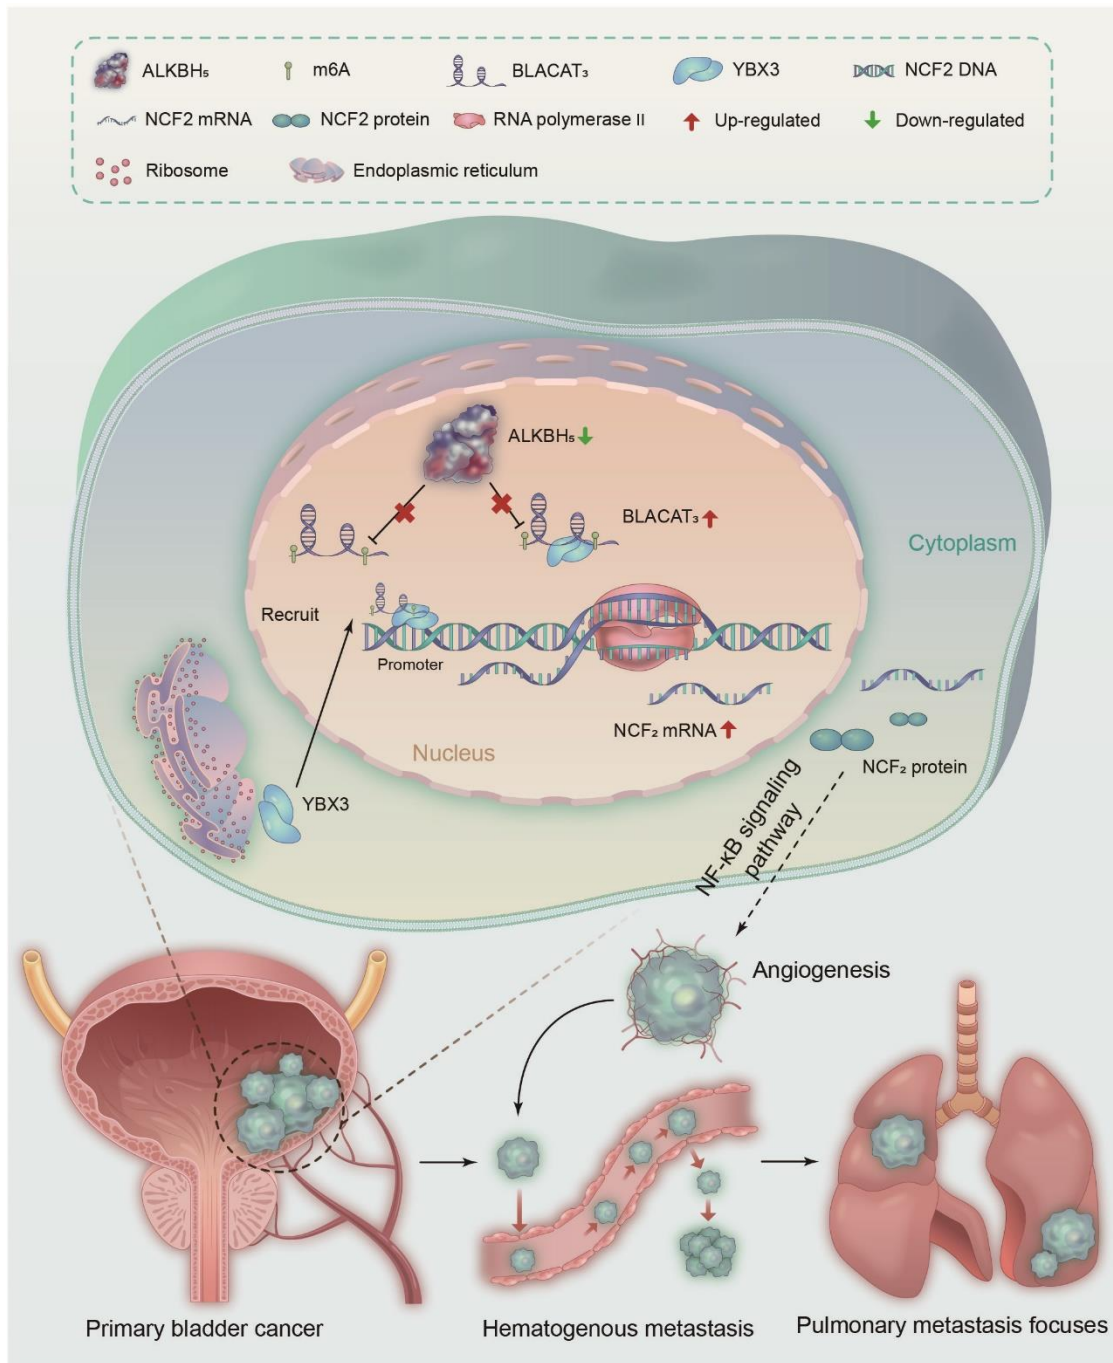

**Supplementary Figure 15. Mechanism diagram by which BLACAT3 promotes BLCa tumor angiogenesis and metastasis.** M6A modification contributes to BLACAT3 upregulation by stabilizing RNA structure. BLACAT3 induces YBX3 to shuttle into the nucleus, synergistically enhances NCF2 transcription, and promotes BLCa angiogenesis and metastasis via activating NF-κB signaling pathway.
